# Supplementary material for: Hierarchical Triple-Channel Architectures Unlock Scalable and High-Efficient Uranium Extraction from Seawater
Source: Research Square preprint supplement (doi:10.21203/rs.3.rs-7405629/v1), 2025-08-29
Supplement: Supplementary file 1 [file f1ef873b0214ad002216dc8e.docx]

Supporting Information

**Hierarchical Triple-Channel Architectures Unlock Scalable and High-Efficient Uranium Extraction from Seawater**

Hui Wang#; Congwen Cao#; Jianming Chen#; Guanbing Zhou; Tao Liu; Yihui Yuan*; Ning Wang*

1 State Key Laboratory of Marine Resource Utilization in South China Sea

Hainan University, Haikou 570228, China

* Corresponding authors. *E-mail addresses*: wangn02@foxmail.com (Ning Wang)

yuanyh@hainanu.edu.cn (Yihui Yuan)

# These authors contributed equally to this work.

Table of Contents

[Supporting Information 1](#_Toc195785044)

[1 Supplementary Figures 3](#_Toc195785045)

[2 Supplementary Tables 13](#_Toc195785046)

[3 Supplementary References 19](#_Toc195785047)

1 Supplementary Figures


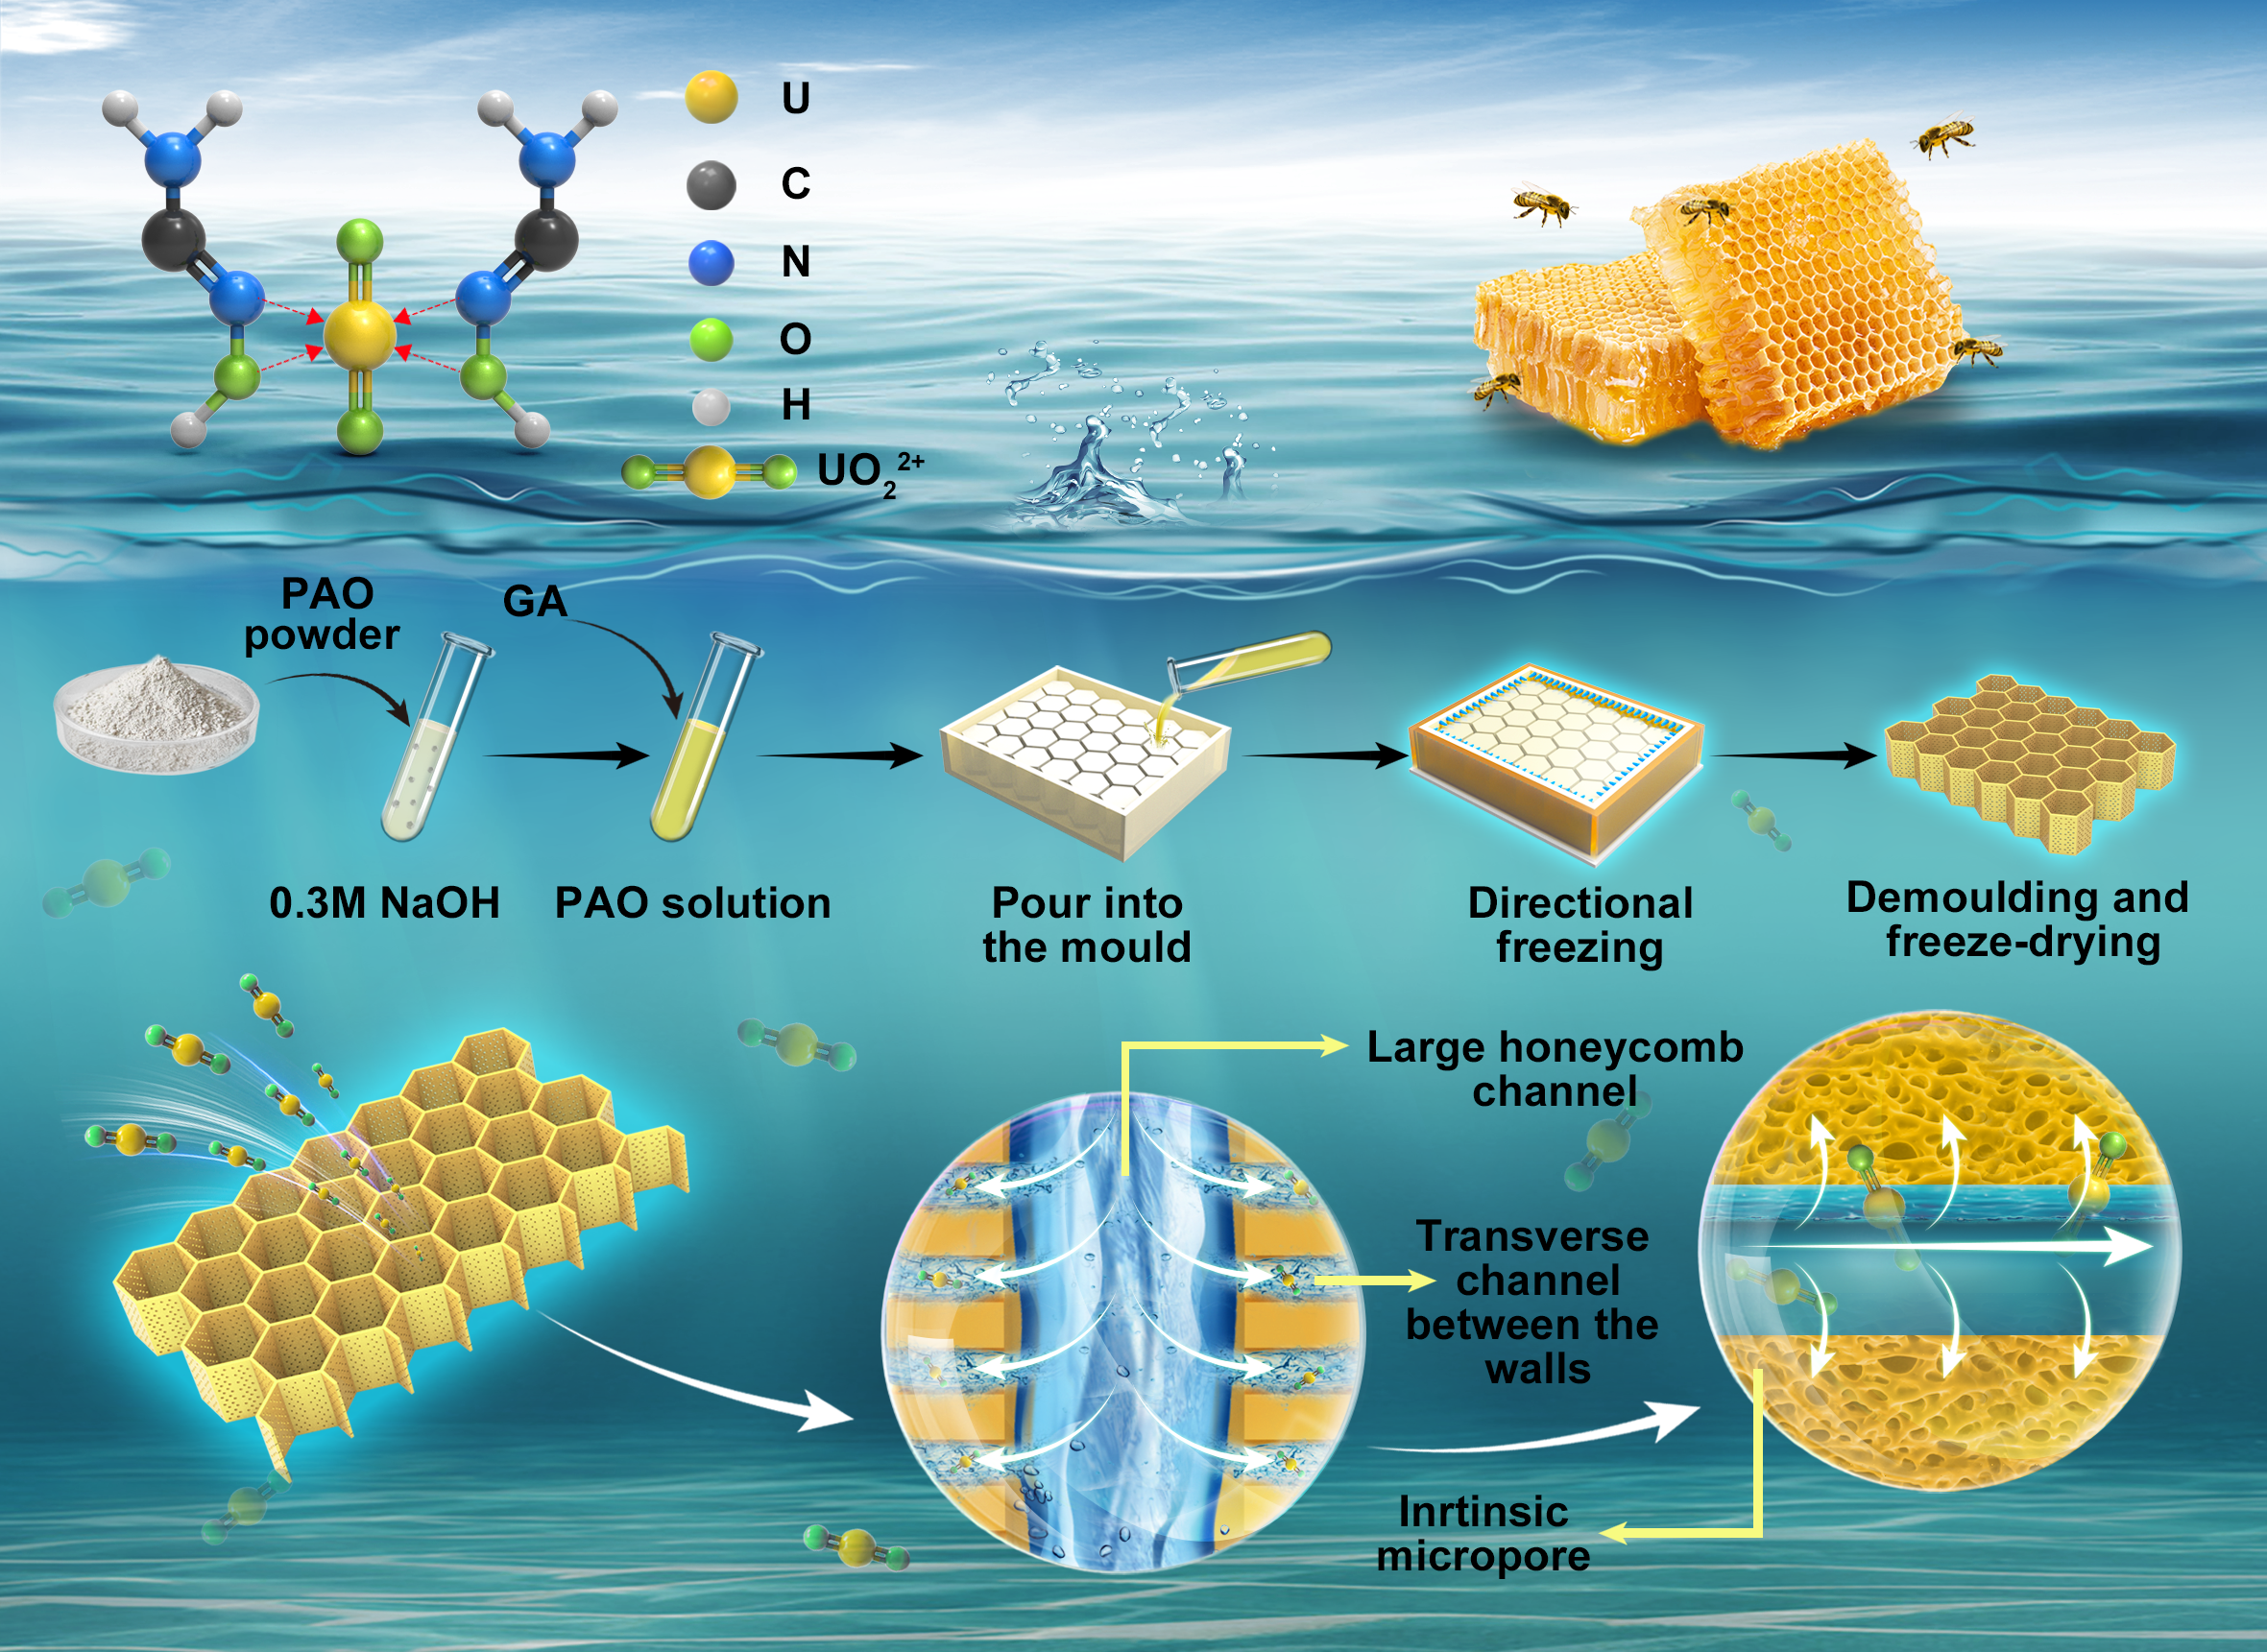


Supplementary Figure 1│Schematic representation of enhanced uranium adsorption in seawater by a honeycomb-inspired bulk adsorbent with hierarchical porous channels.

**
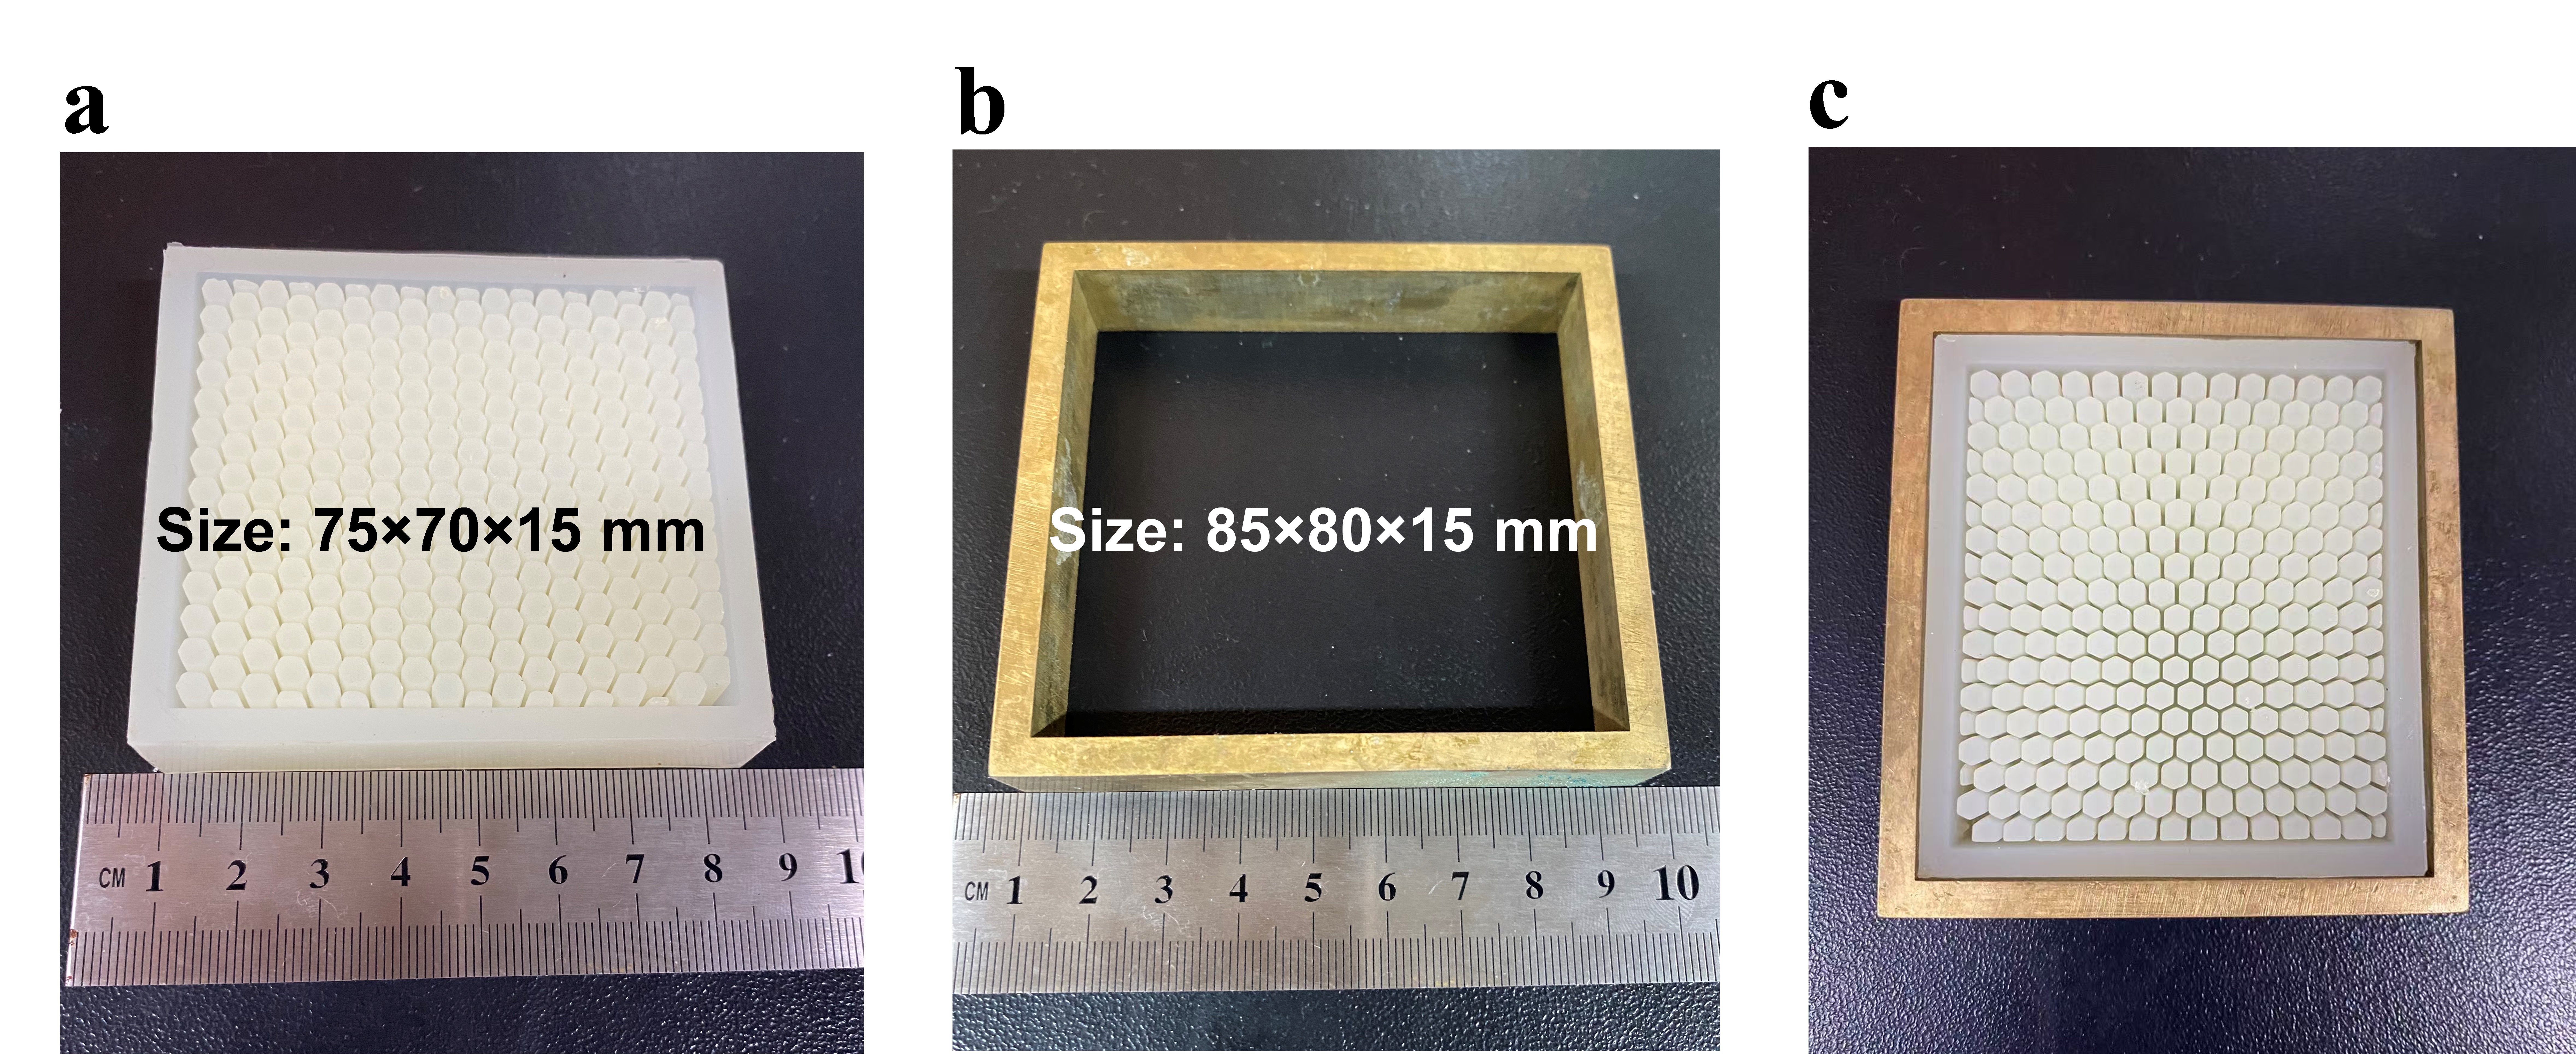
**

Supplementary Figure 2│Silica gel templates with regularly arranged honeycomb columns and size-matched brass frames.

**
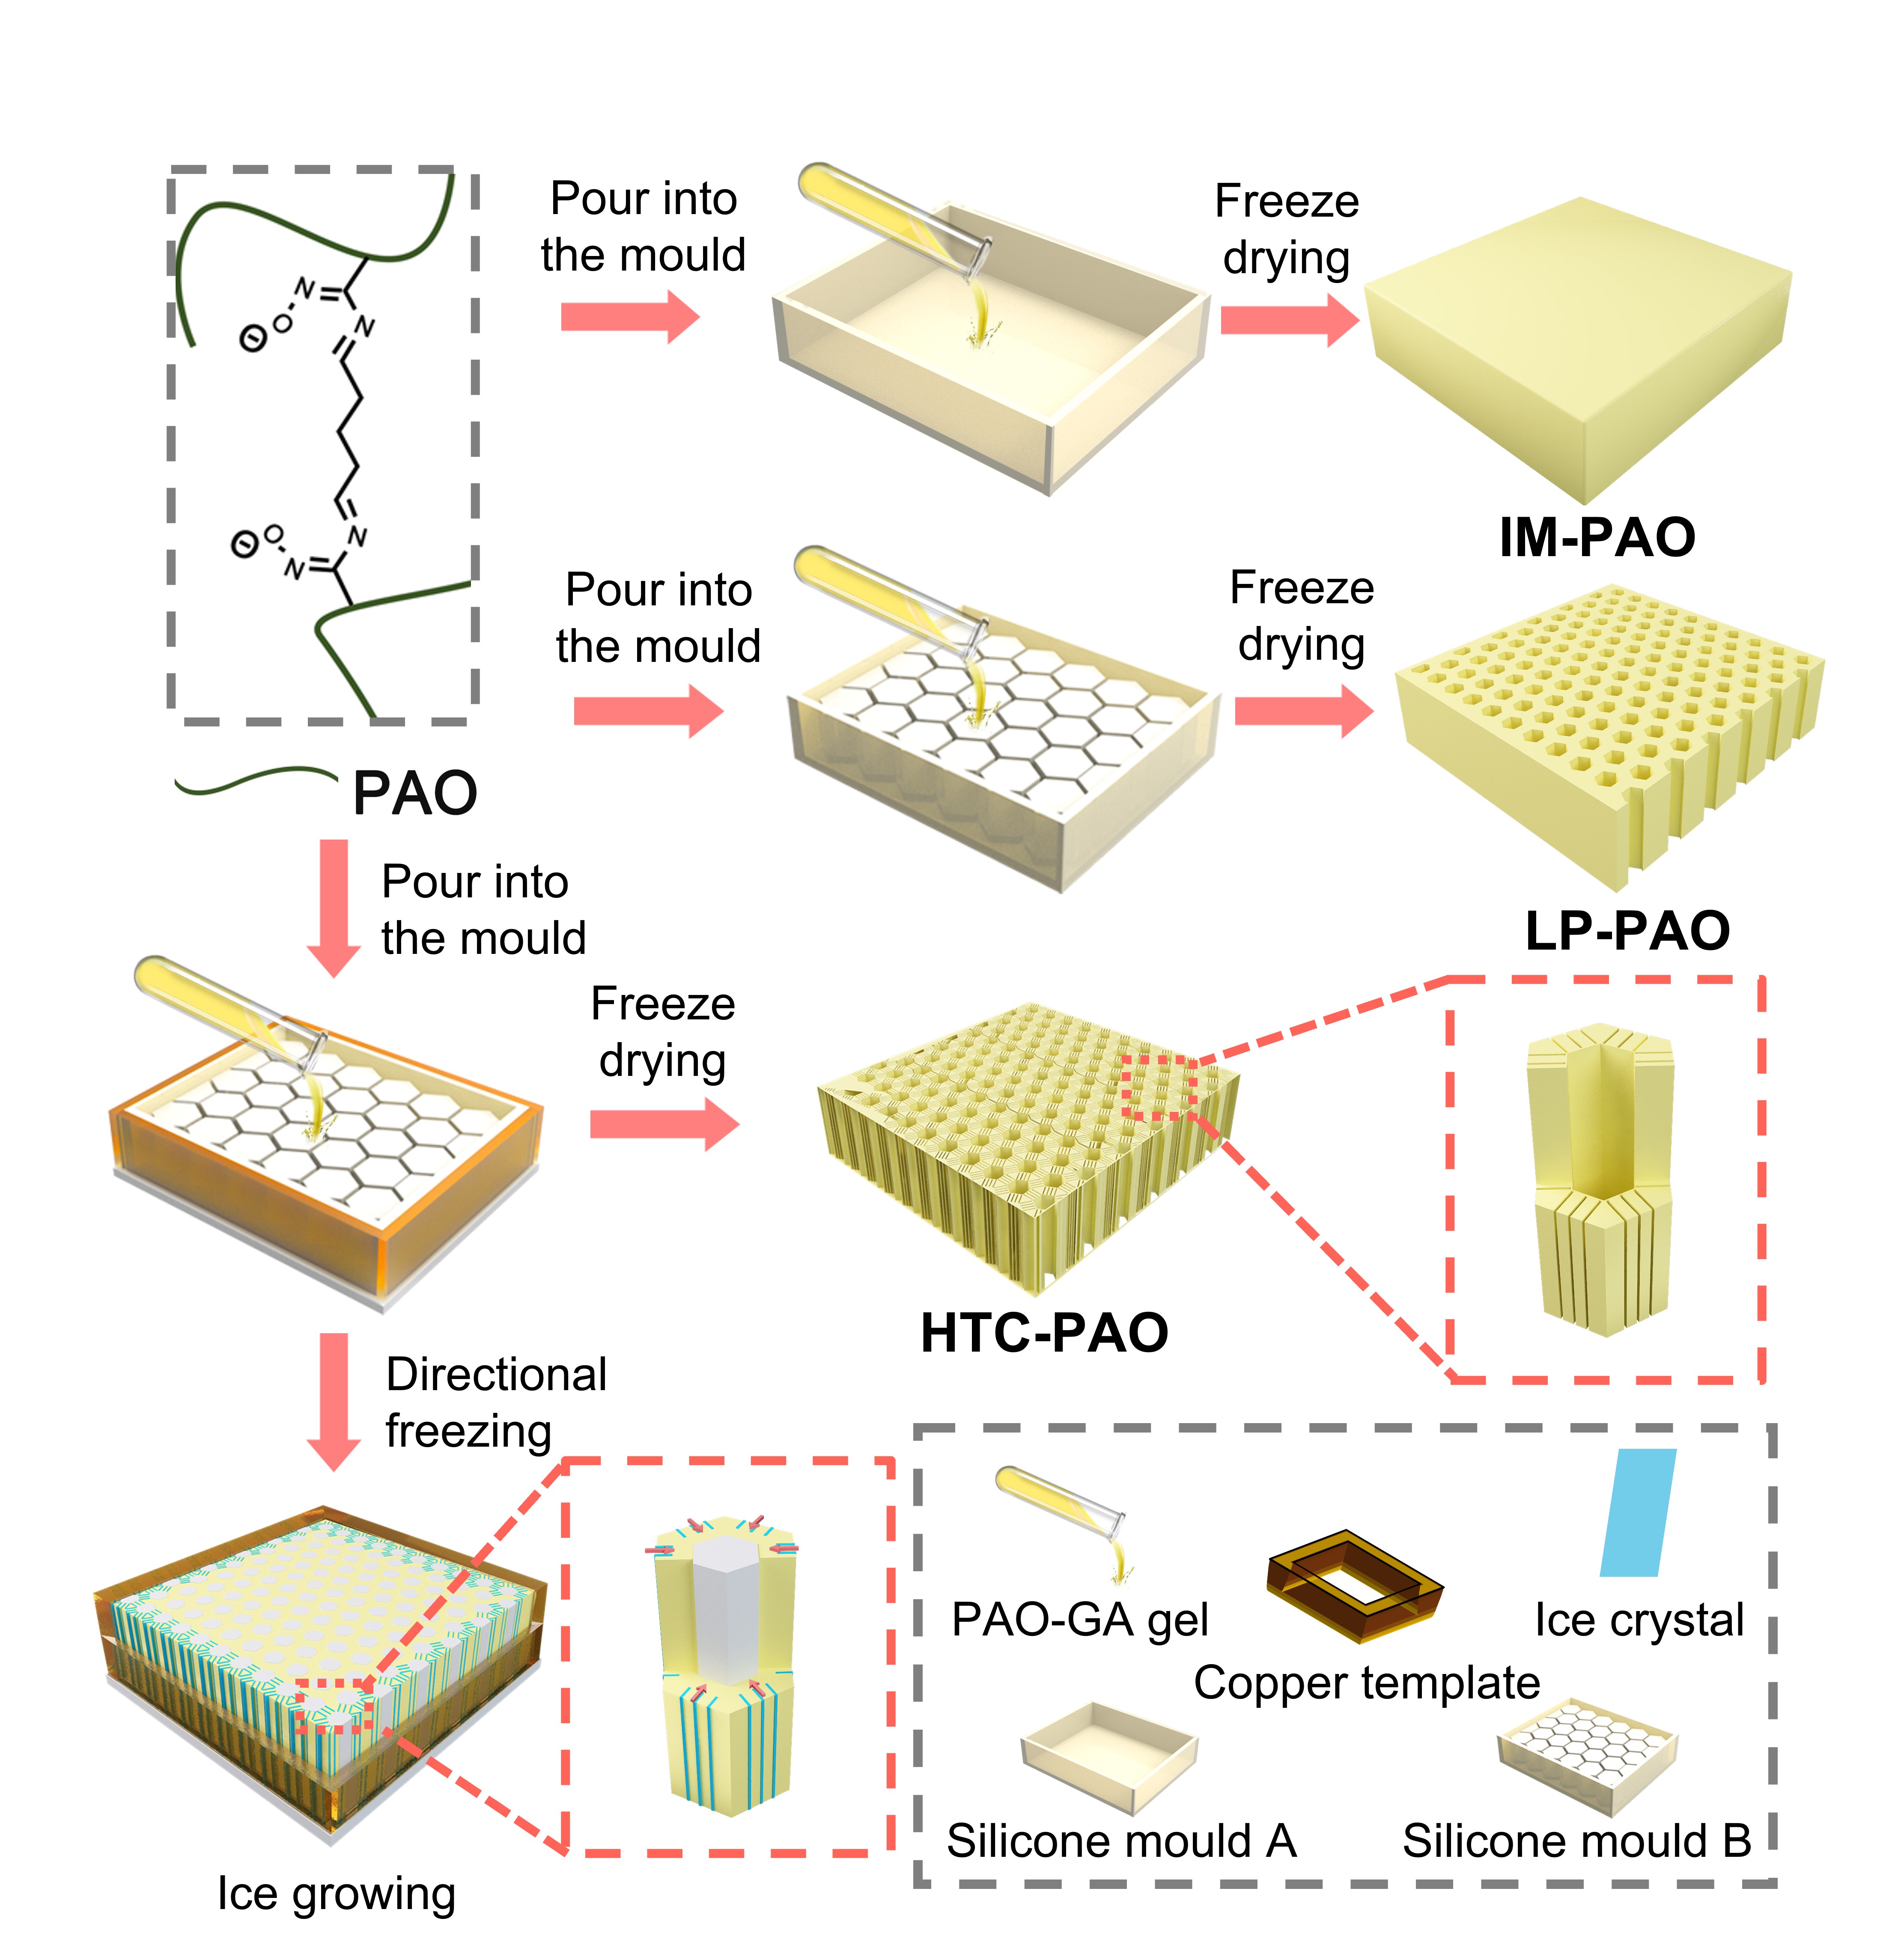
**

Supplementary Figure 3│Synthesis of IM-PAO, LP-PAO and HTC-PAO.

**
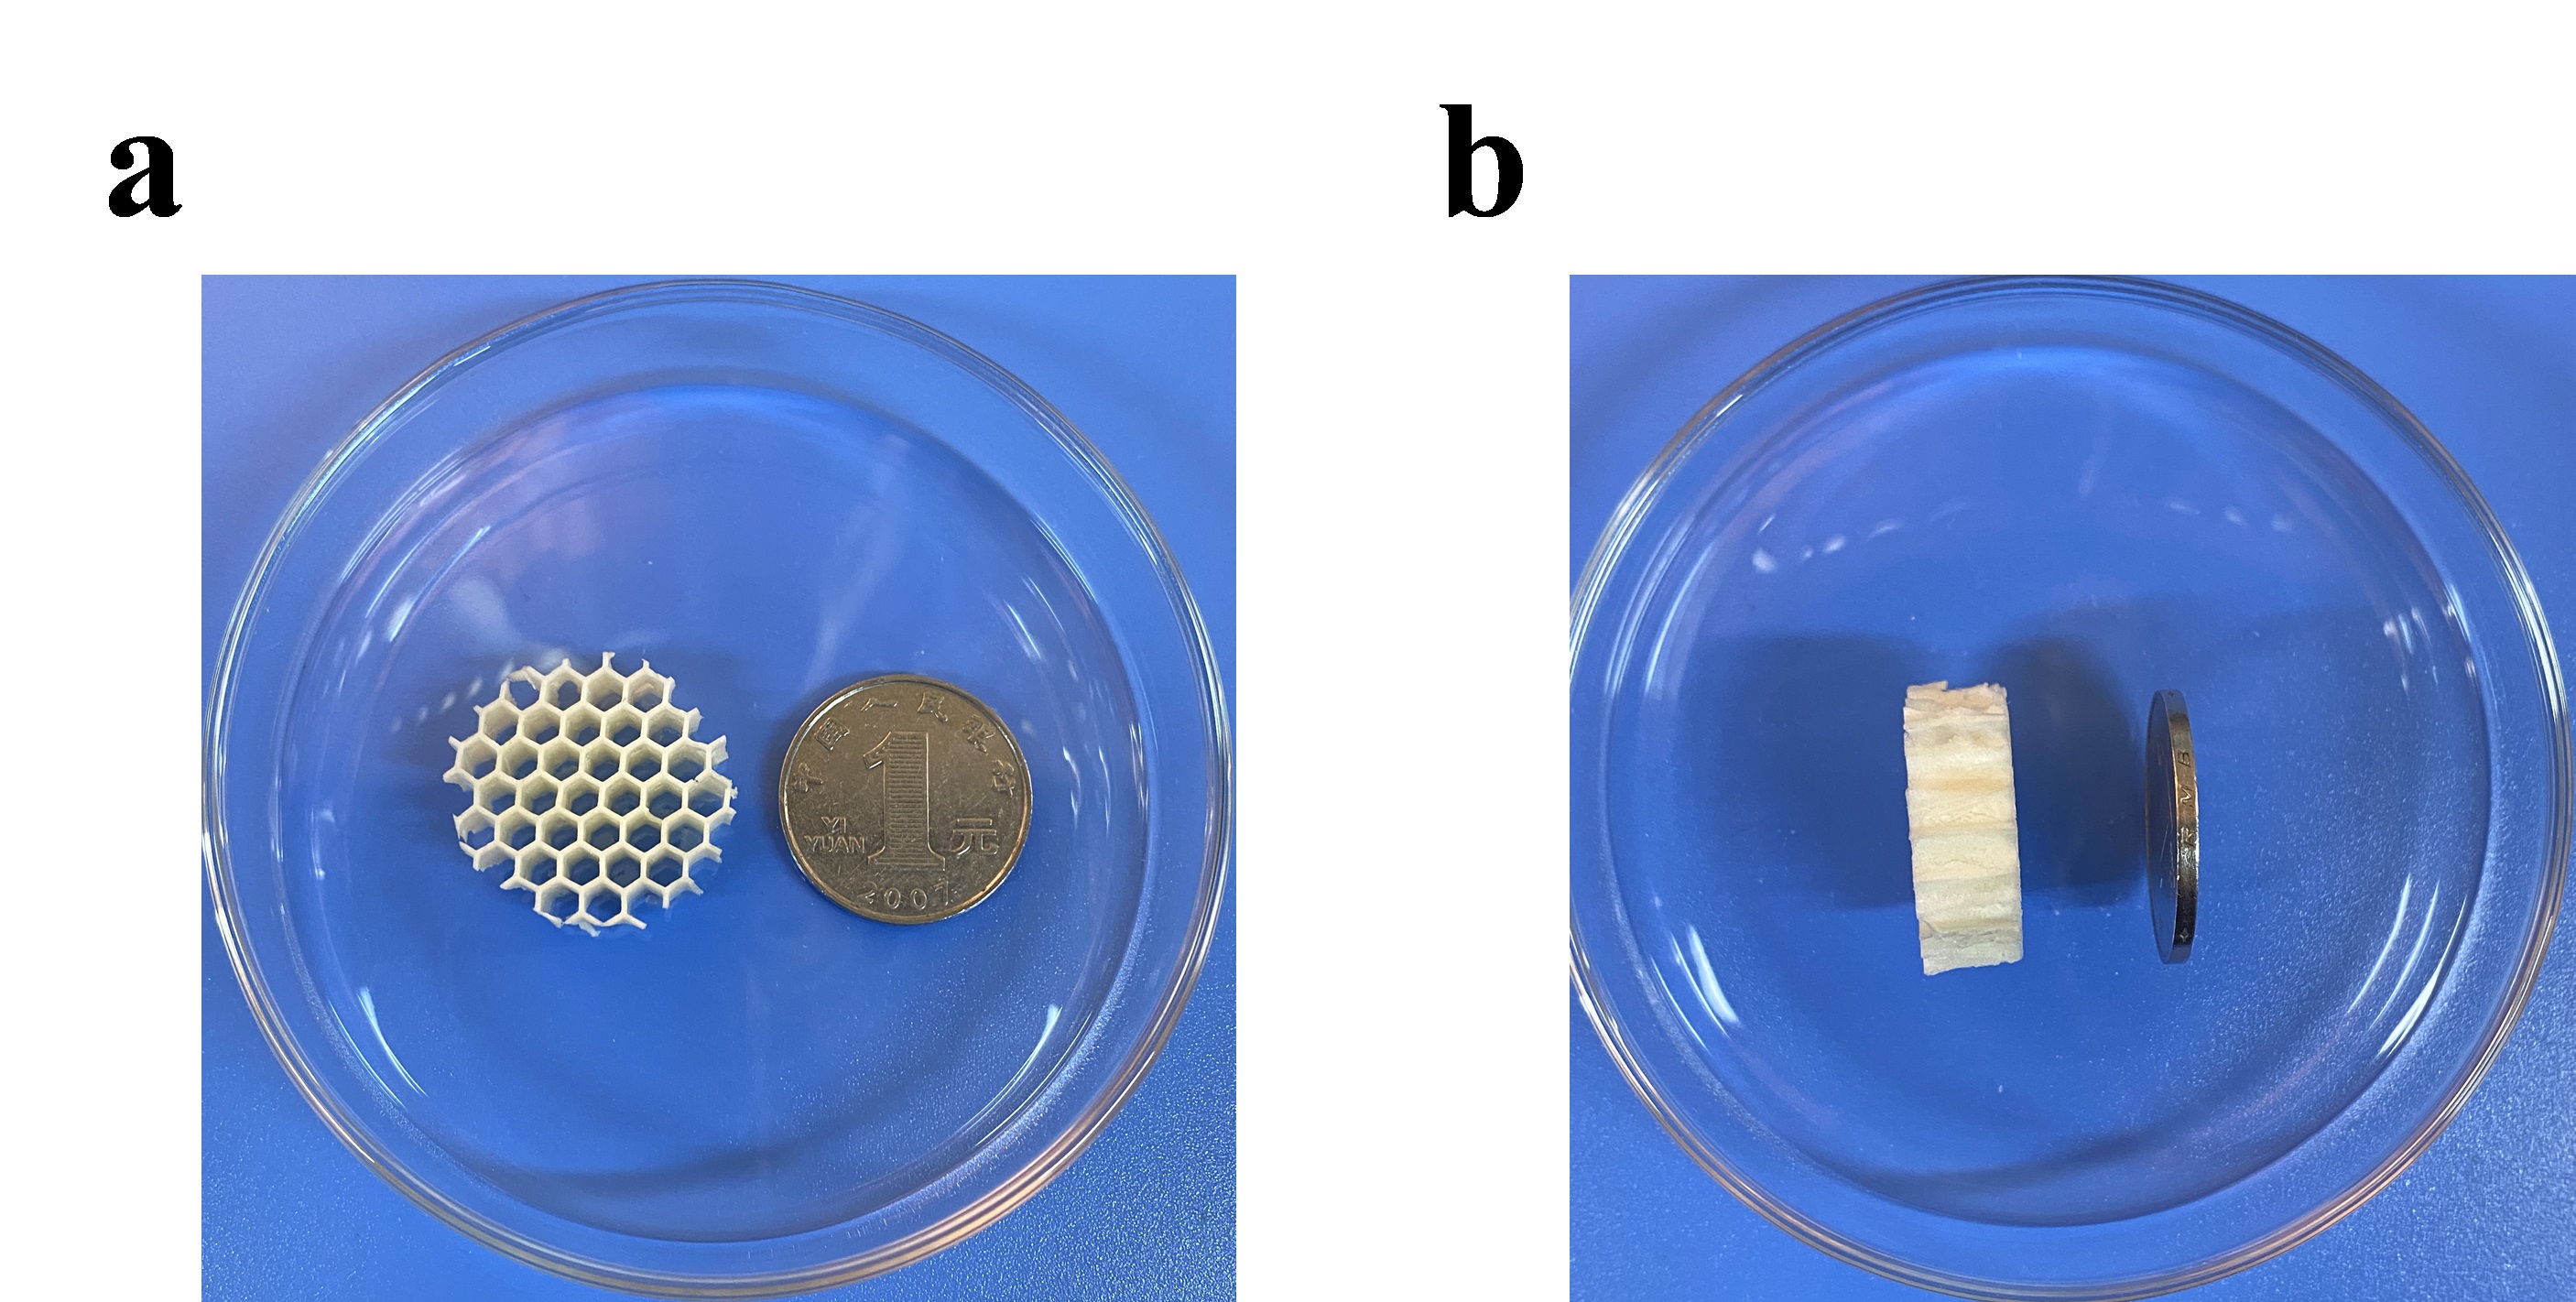
**

Supplementary Figure 4│The physical form of HTC-PAO.

**
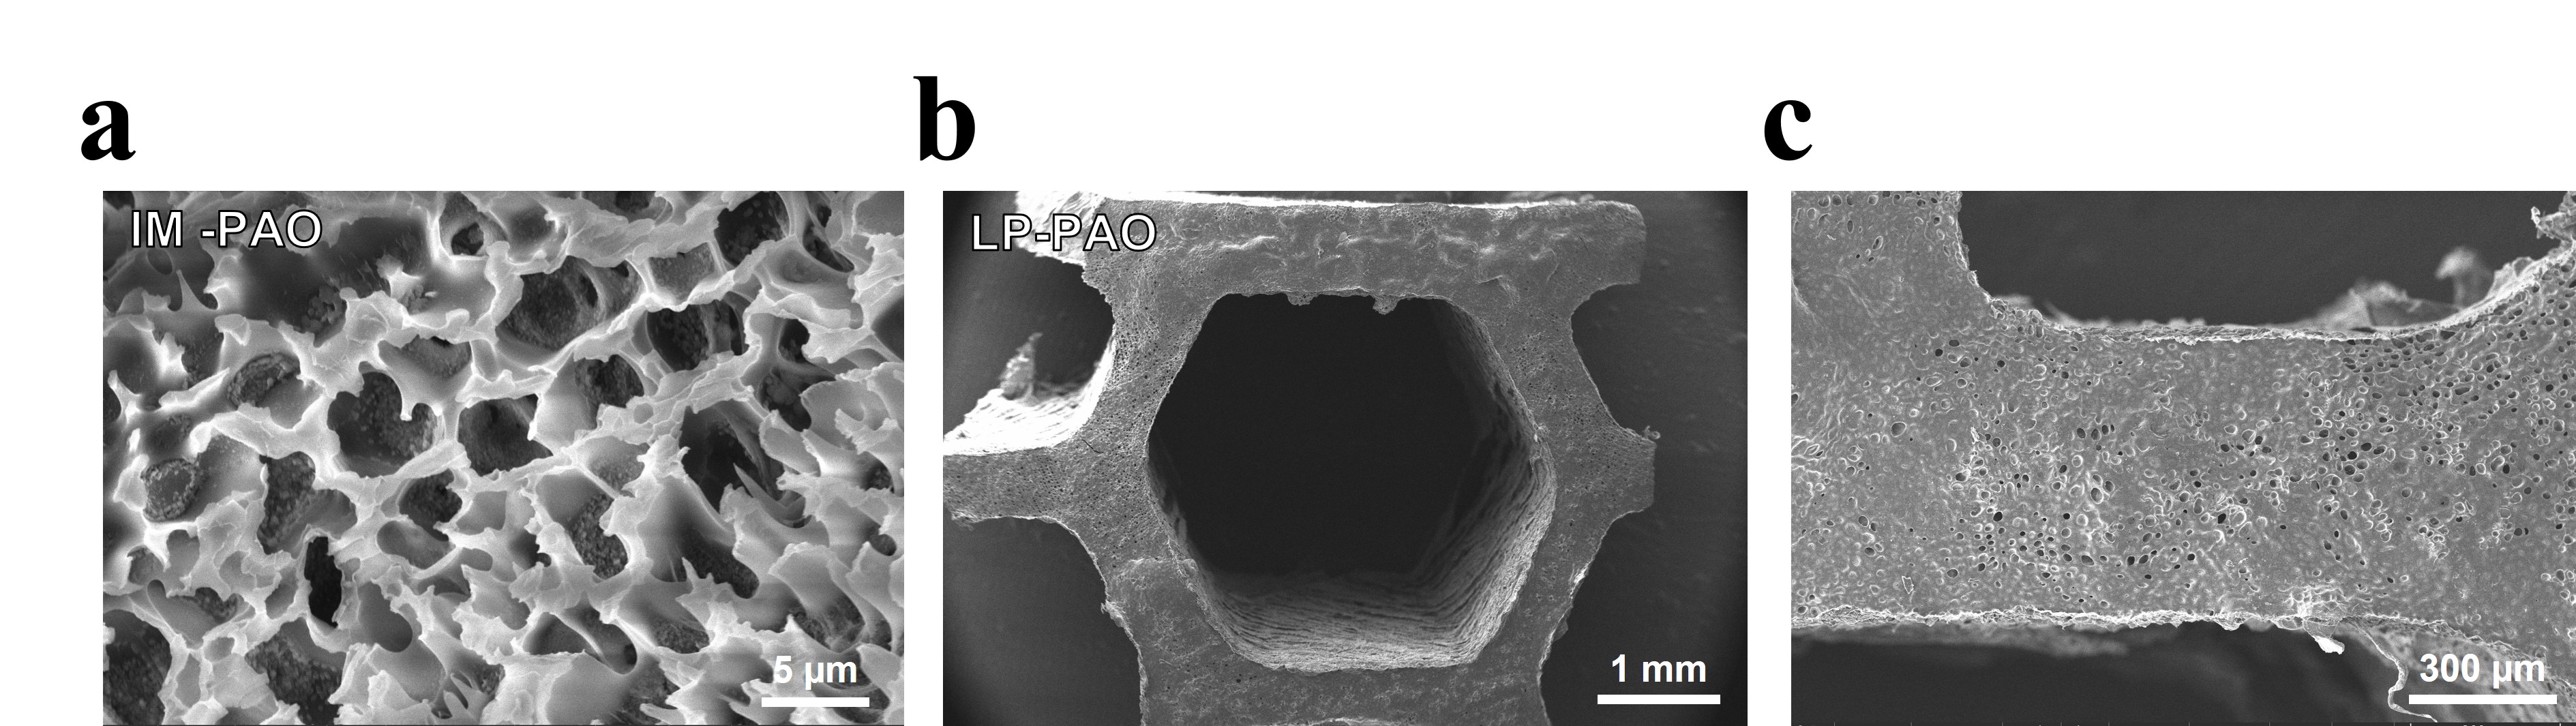
**

Supplementary Figure 5│SEM images of IM-PAO and LP-PAO.


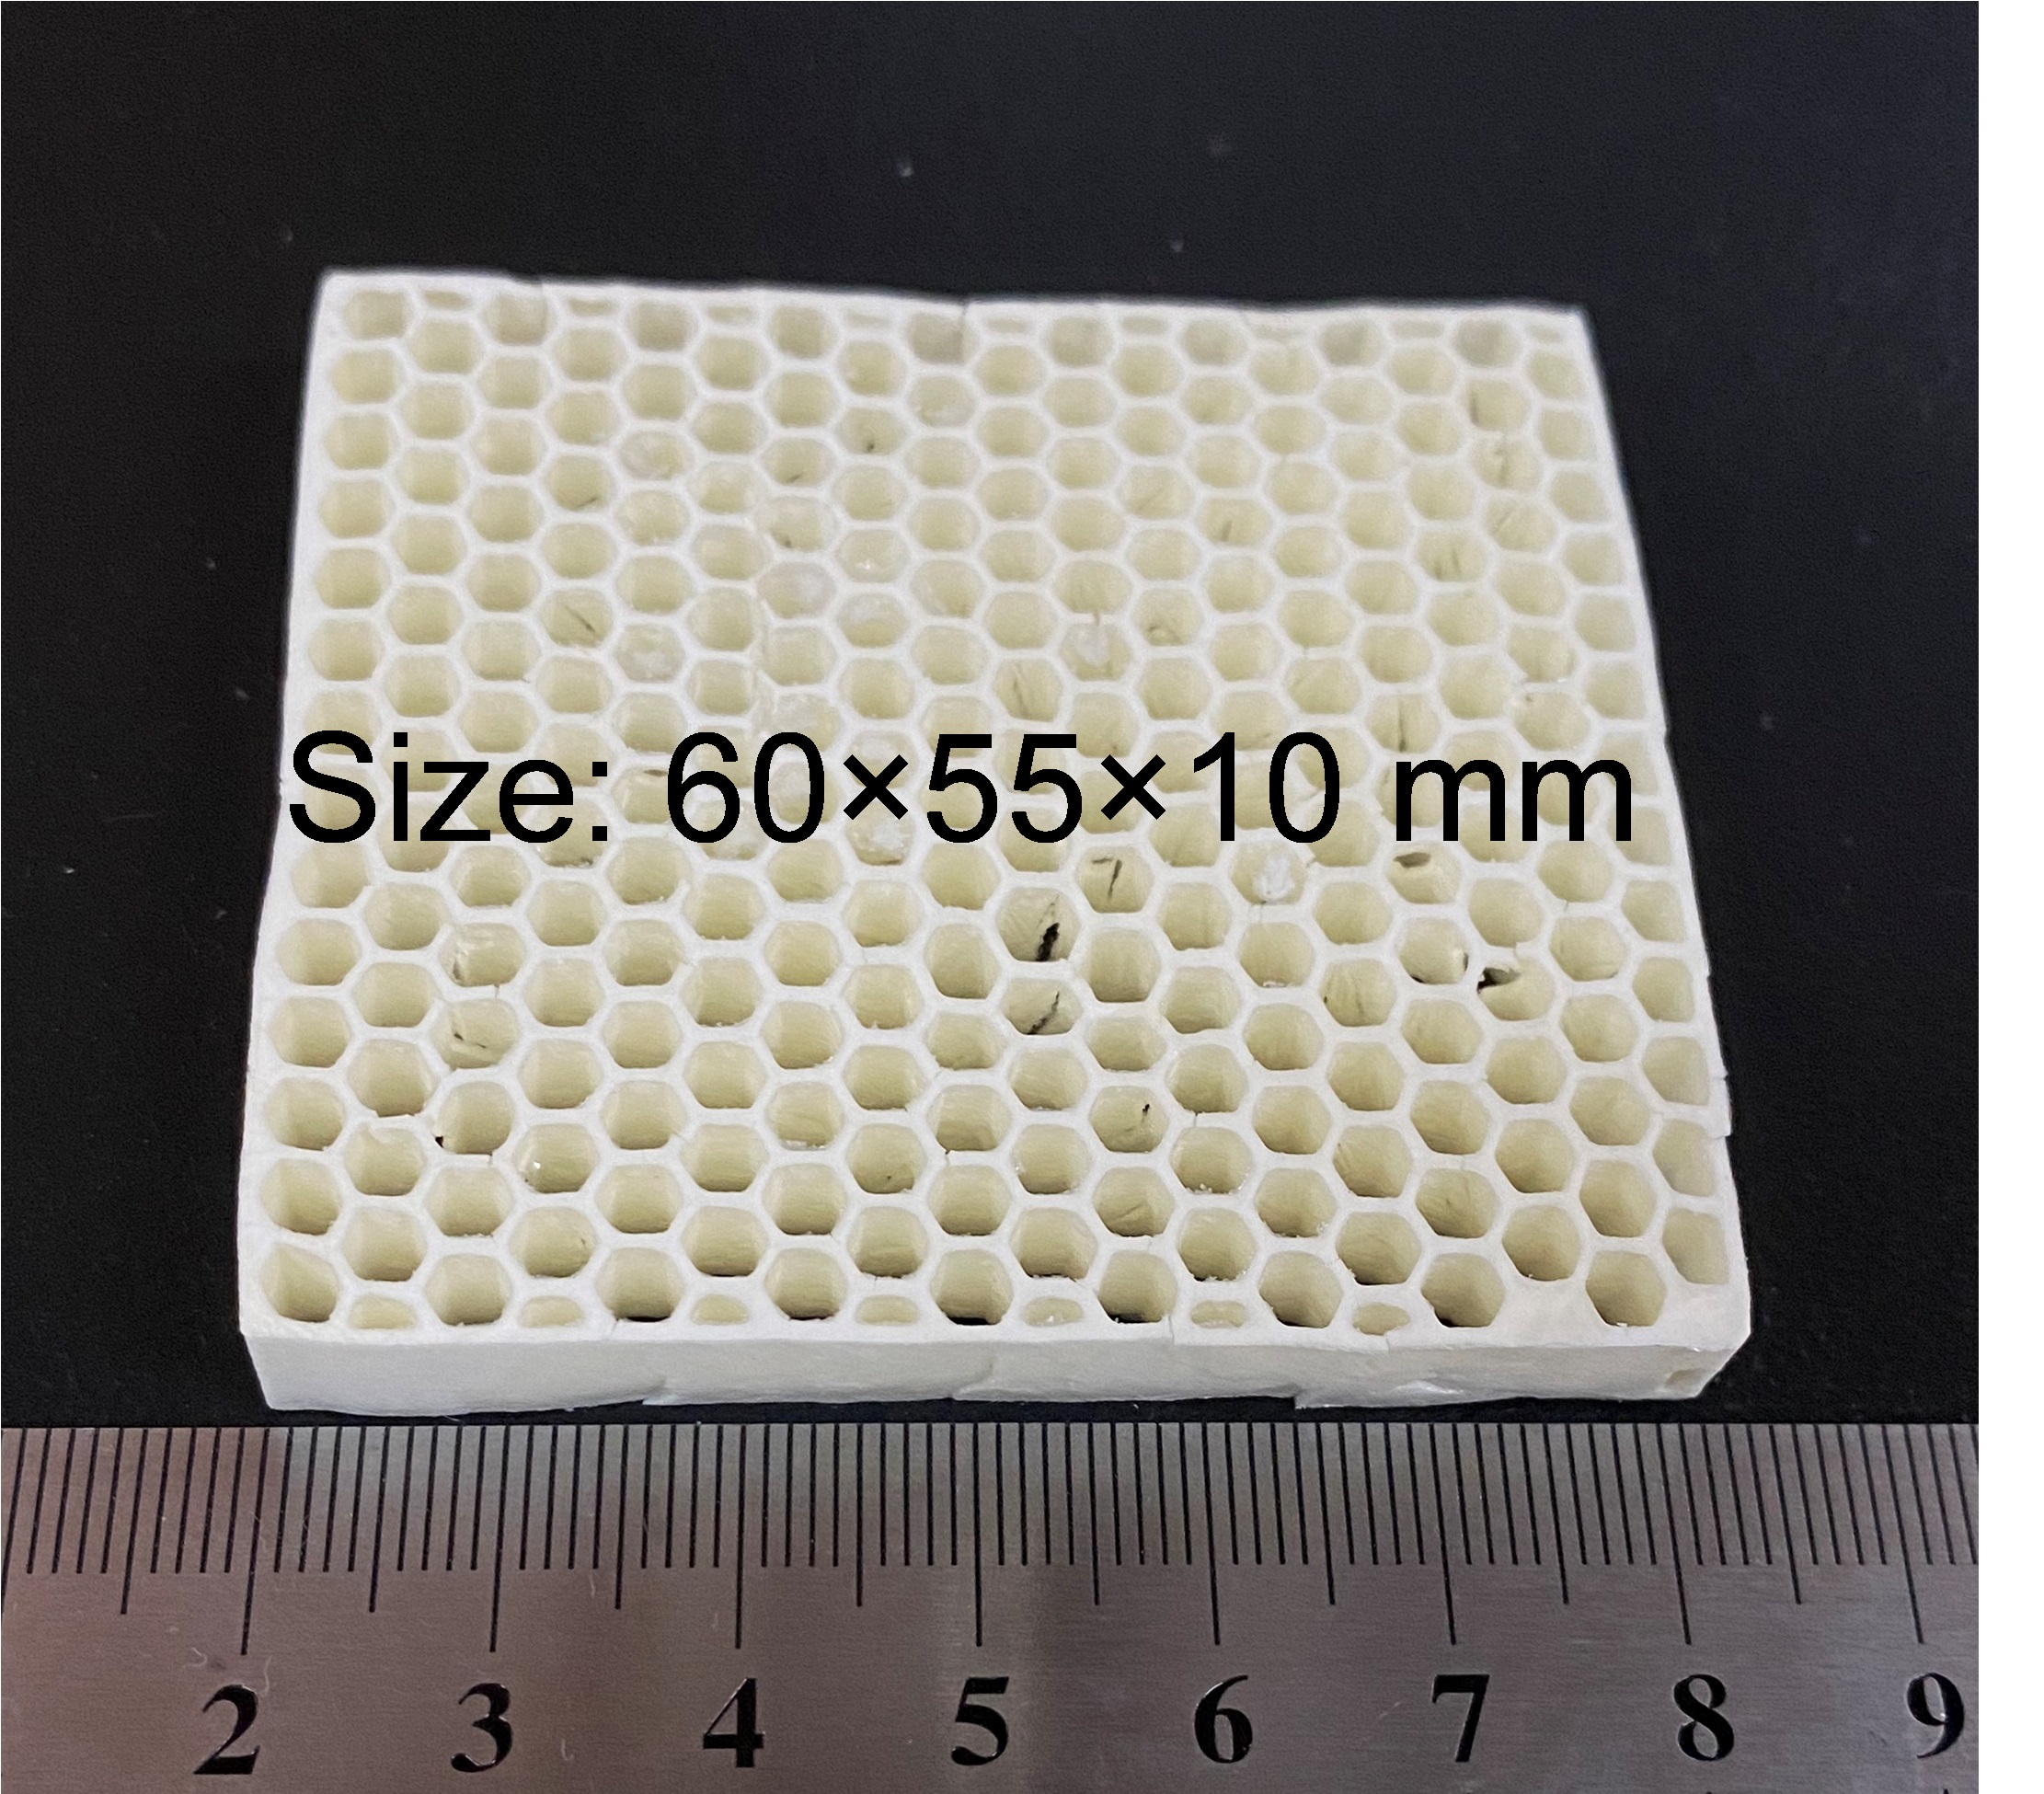


Supplementary Figure 6│Digital photograph of HTC-PAO block with the size of 60 mm (L) × 55 mm (W) × 10 mm (H).


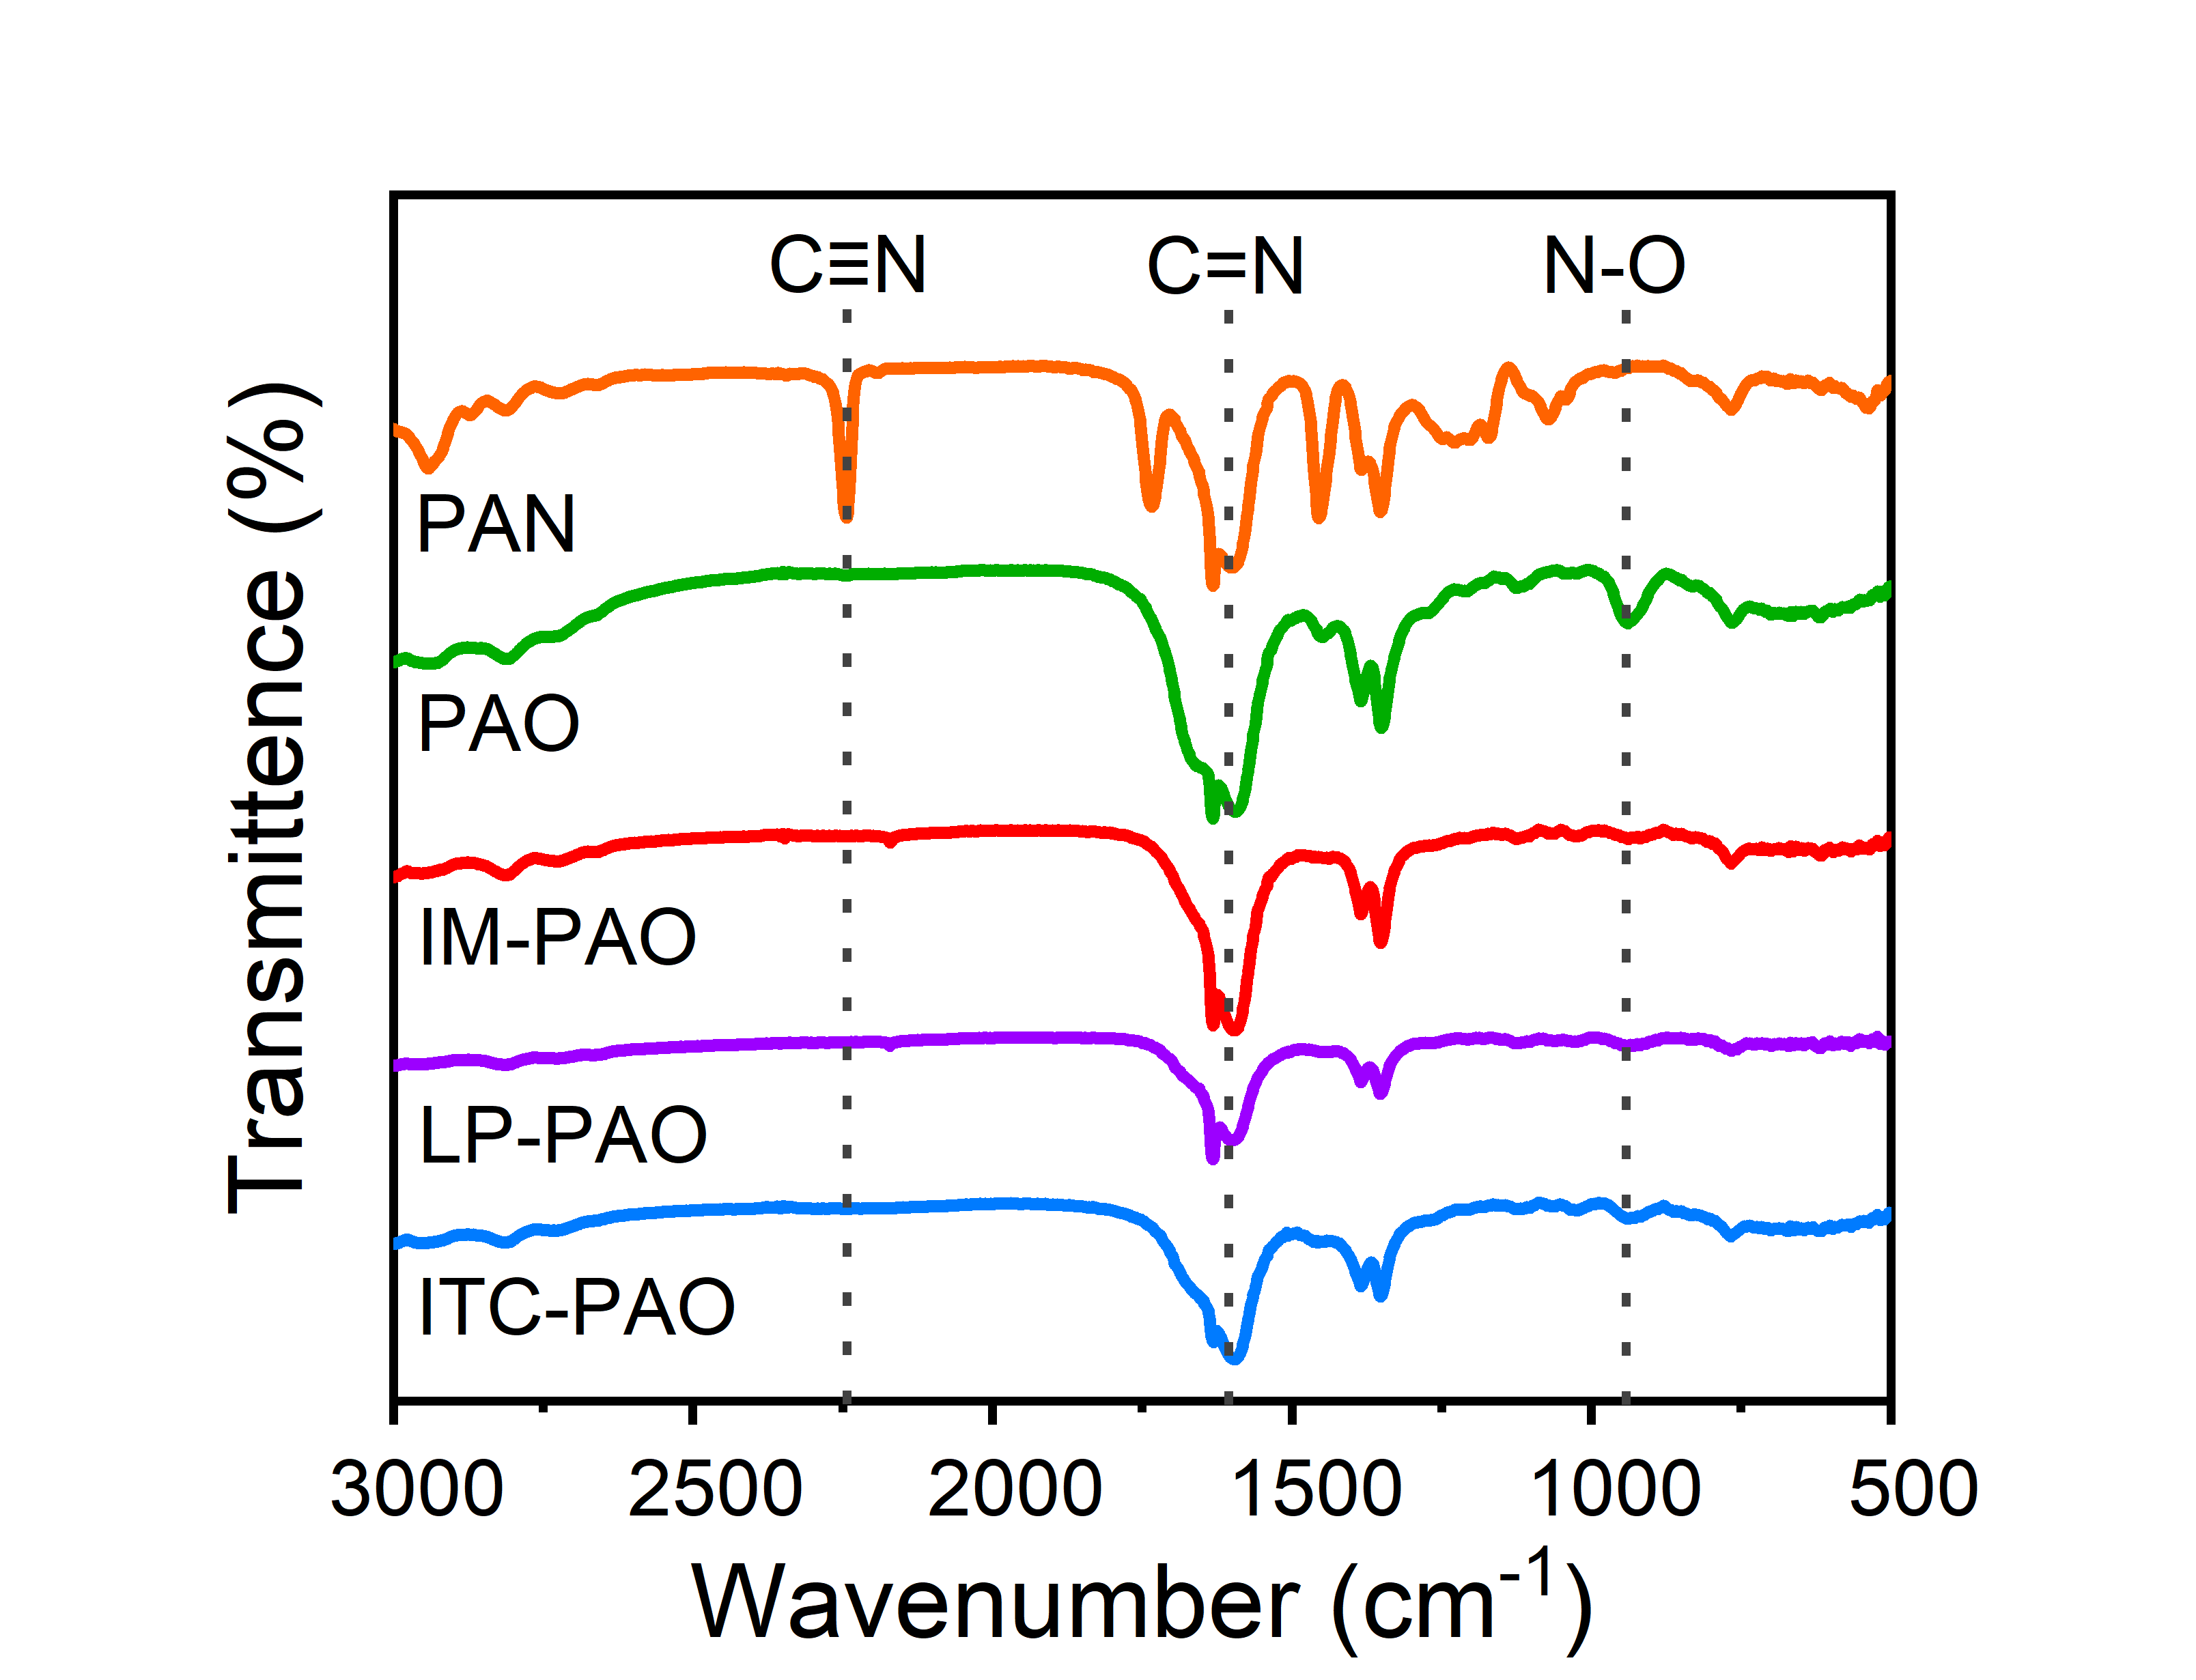


Supplementary Figure 7│FTIR spectra of PAN, PAO, IM-PAO, LP-PAO, and HTC-PAO are presented.

**
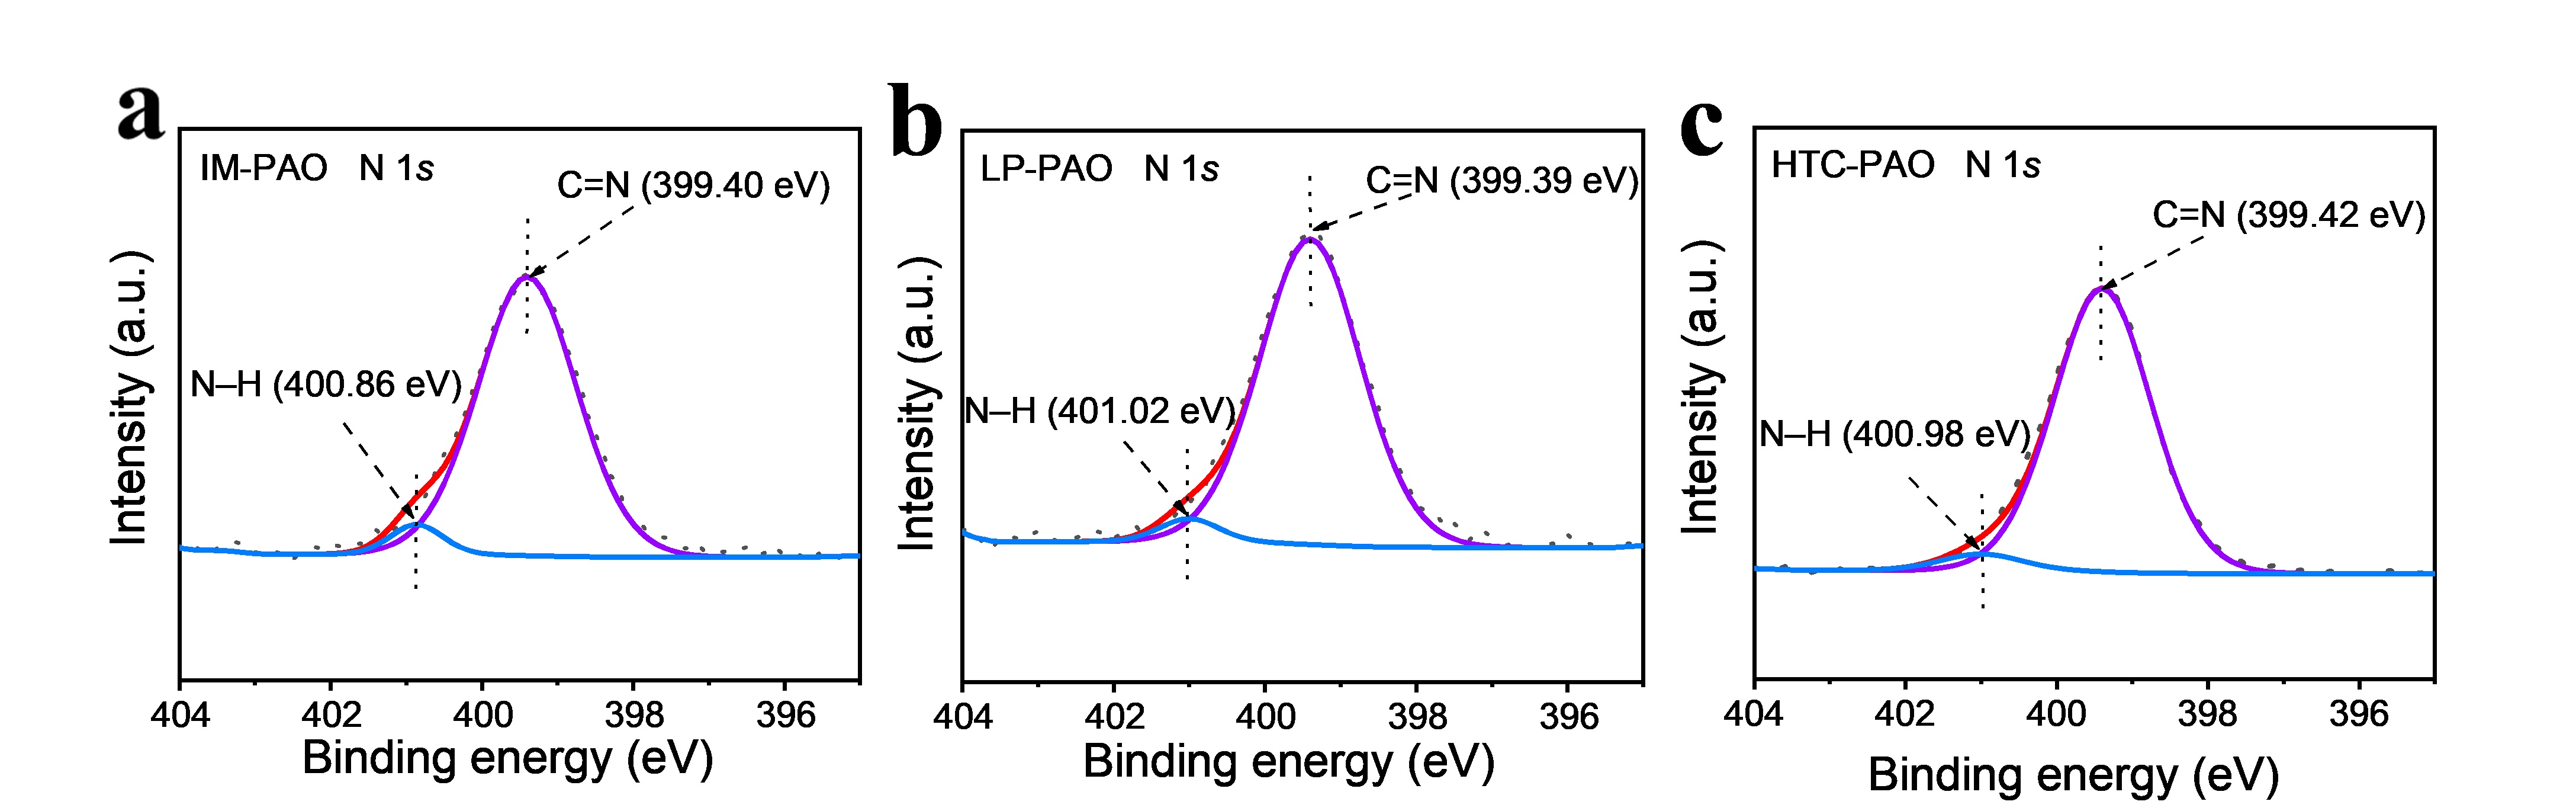
**

Supplementary Figure 8│High-resolution XPS spectra for IM-PAO, LP-PAO and HTC-PAO in N 1s area.


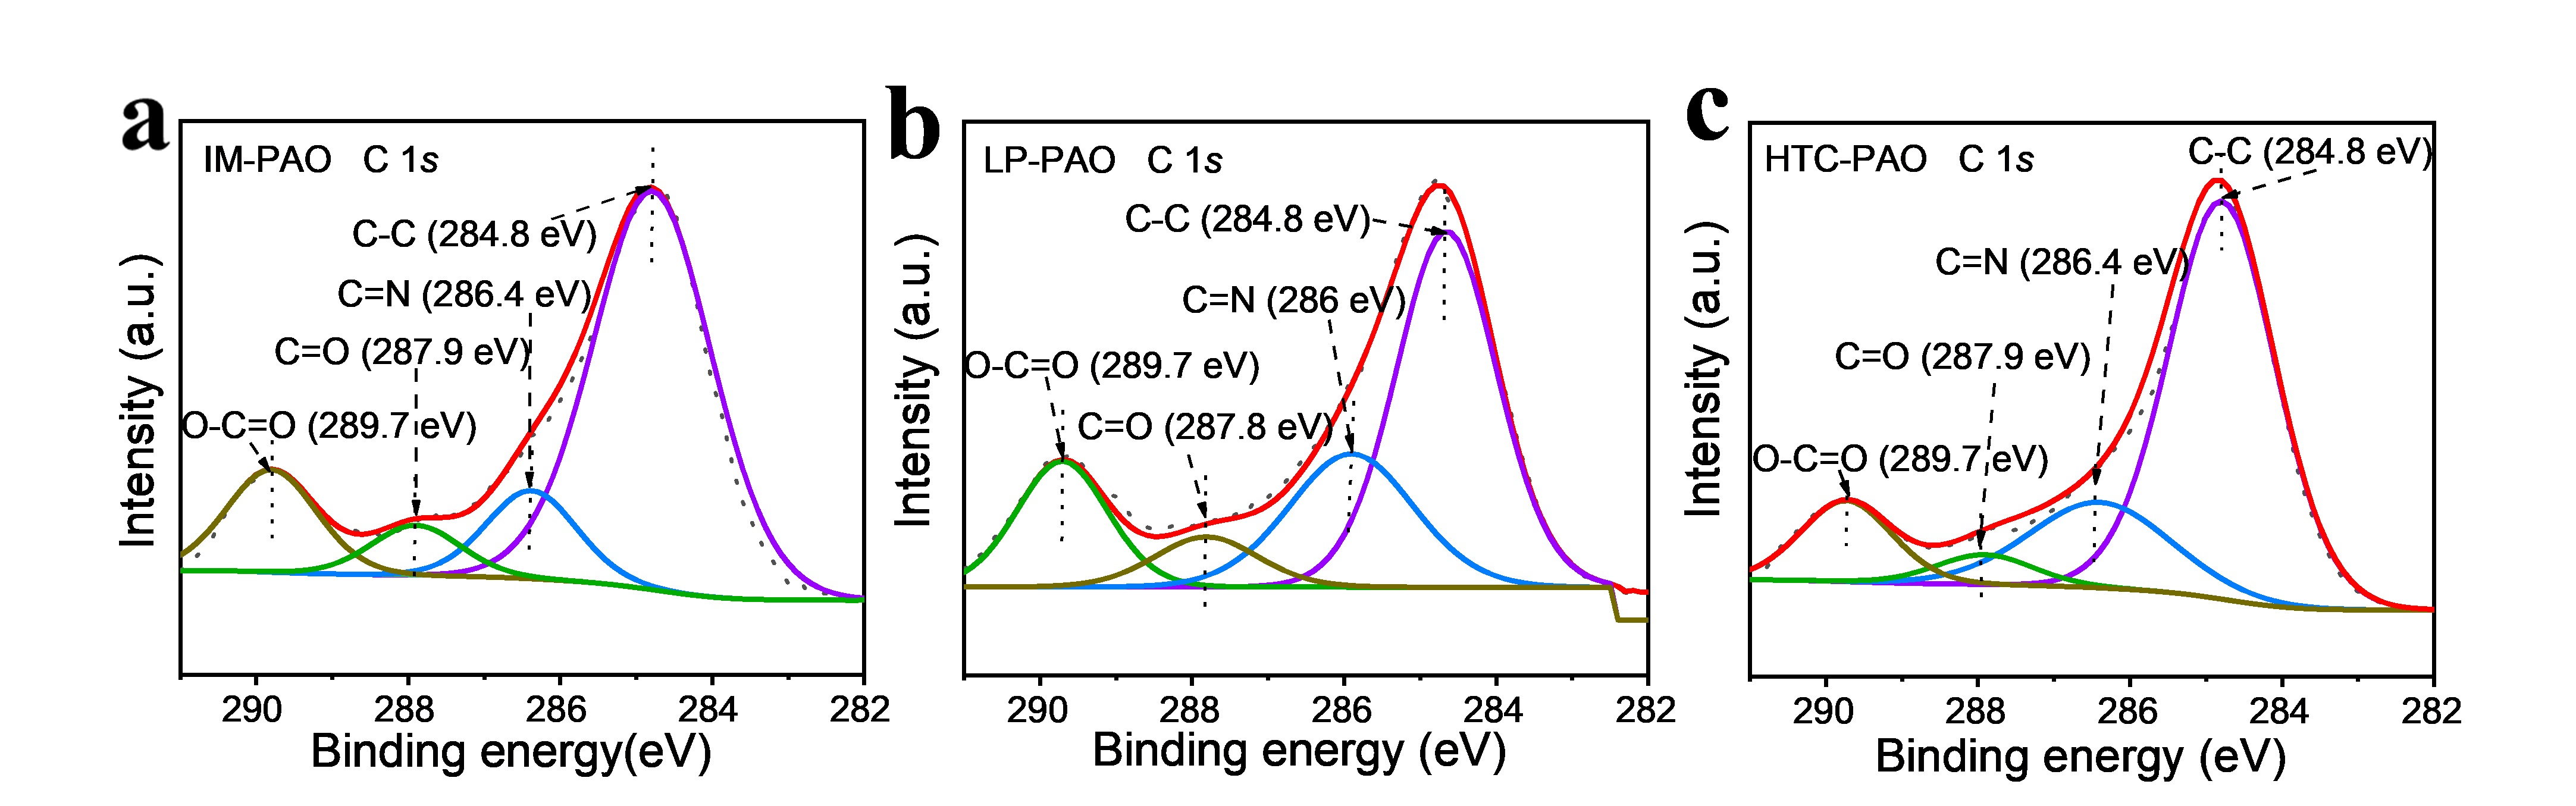


Supplementary Figure 9│High-resolution XPS spectra for IM-PAO, LP-PAO and HTC-PAO in C1s area.


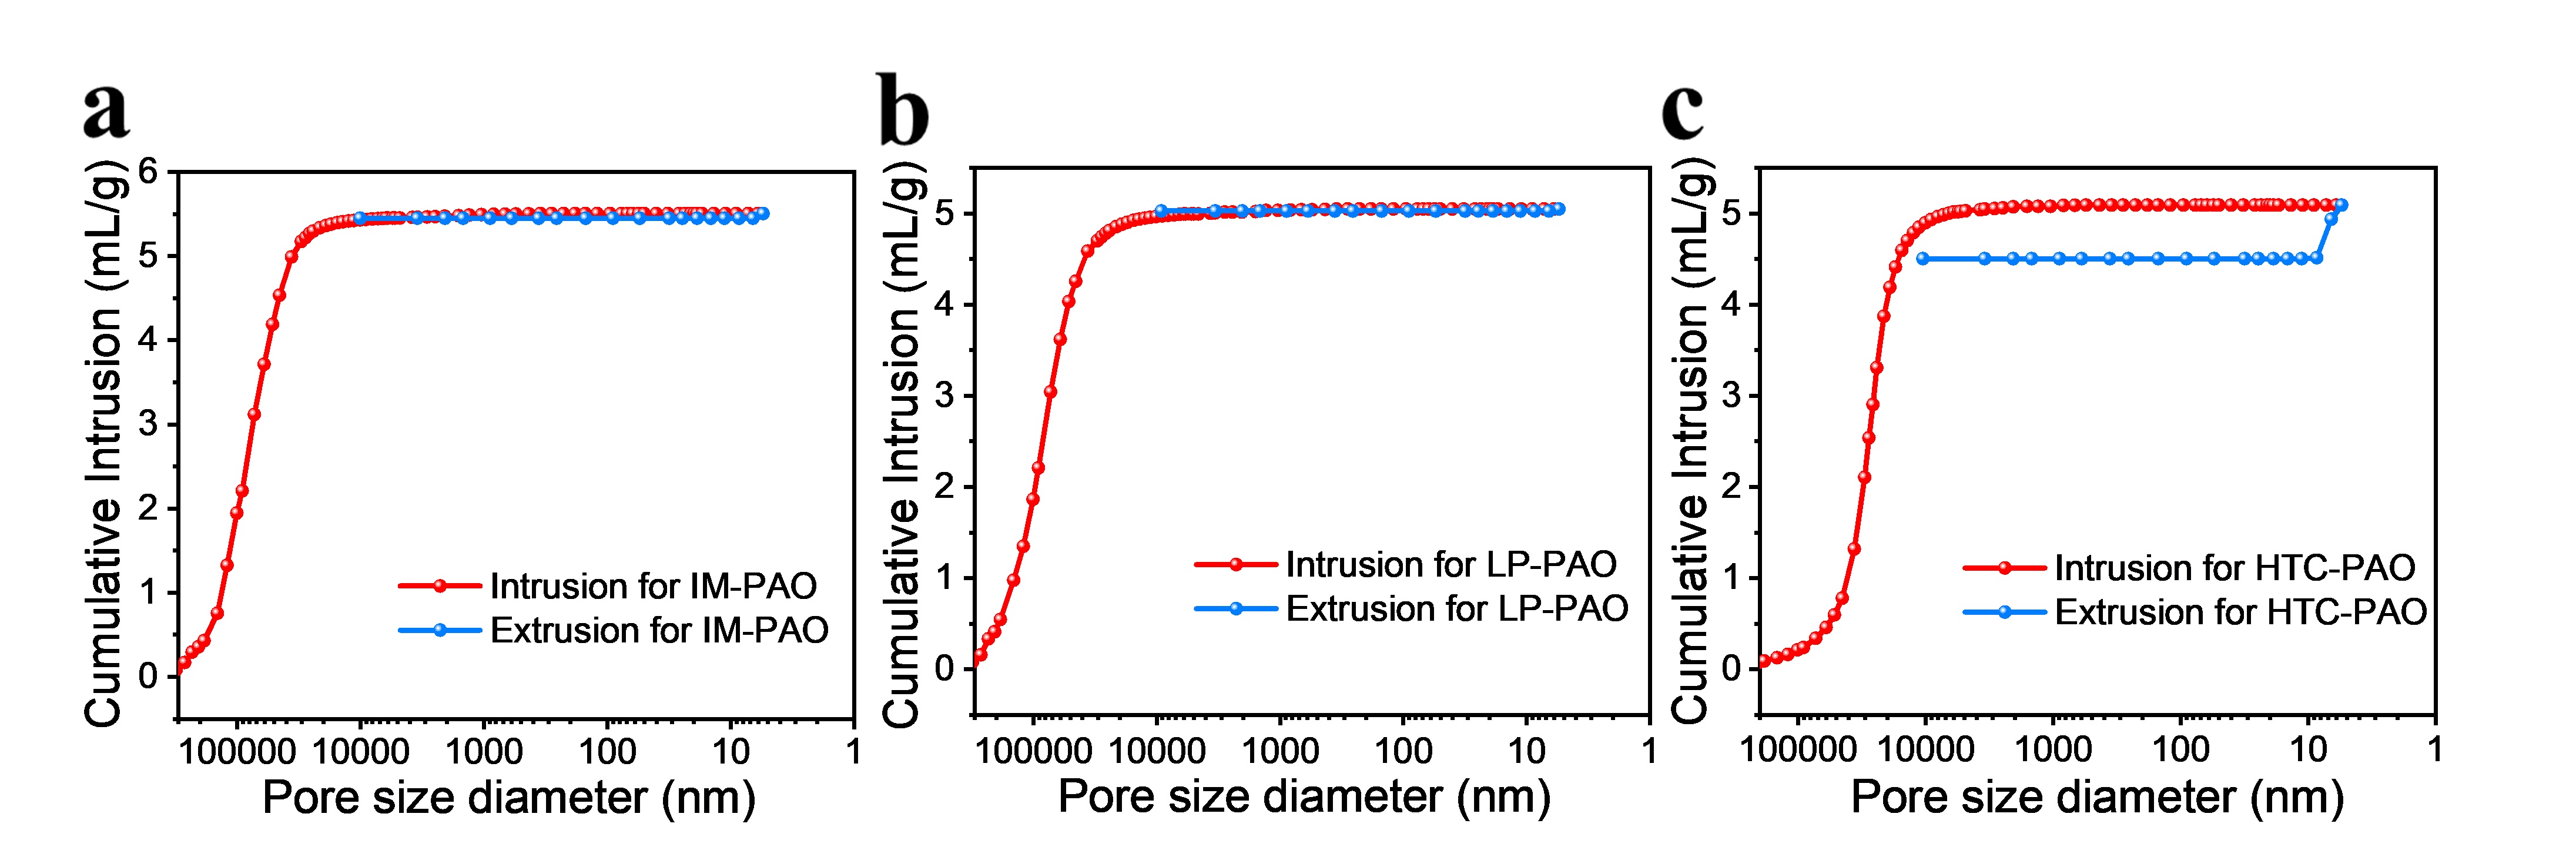


Supplementary Figure 10│Mercury intrusion-extrusion curves of IM-PAO, LP-PAO and HTC-PAO.


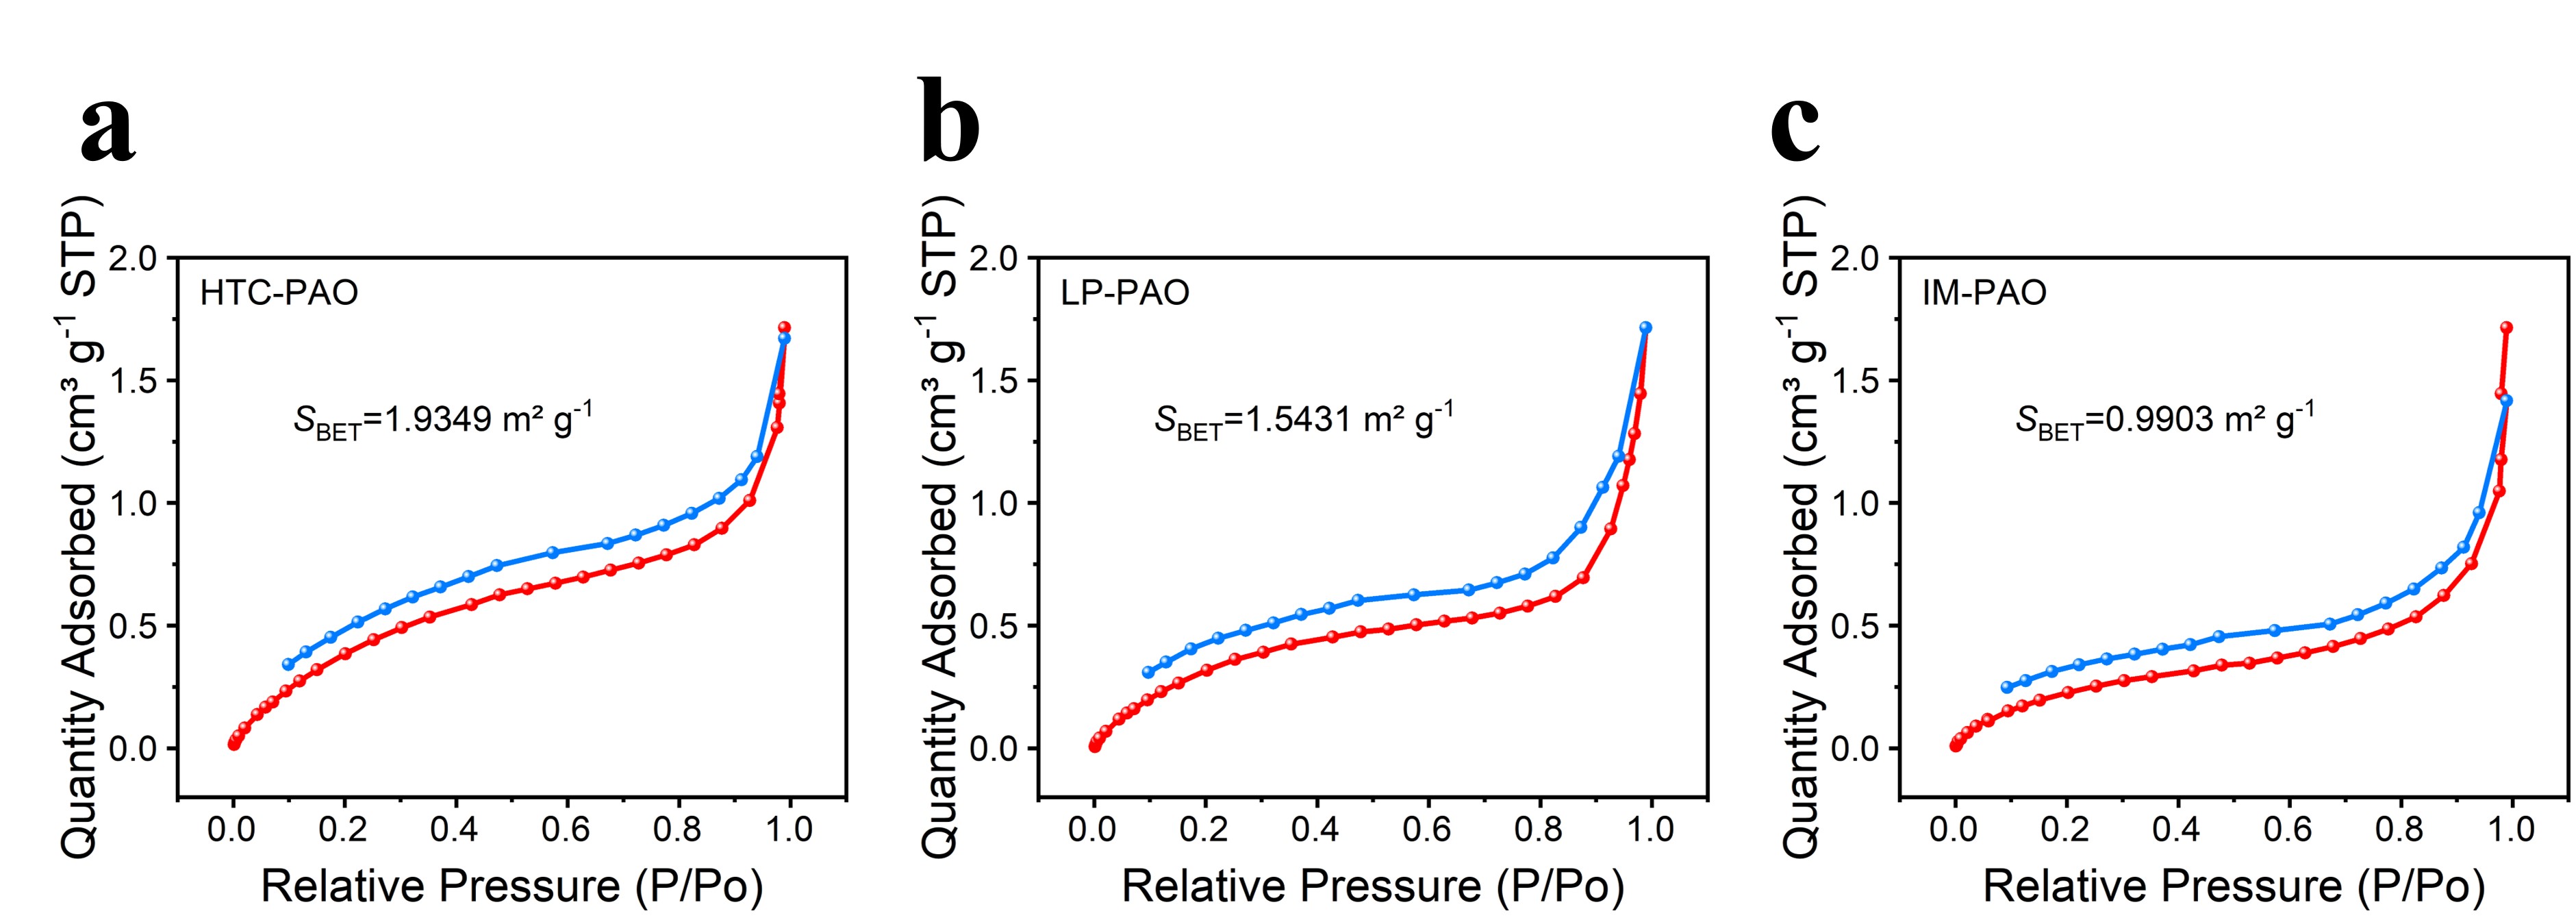


**Supplementary Figure 11│Nitrogen adsorption–desorption isotherms of IM-PAO, LP-PAO and HTC-PAO.**


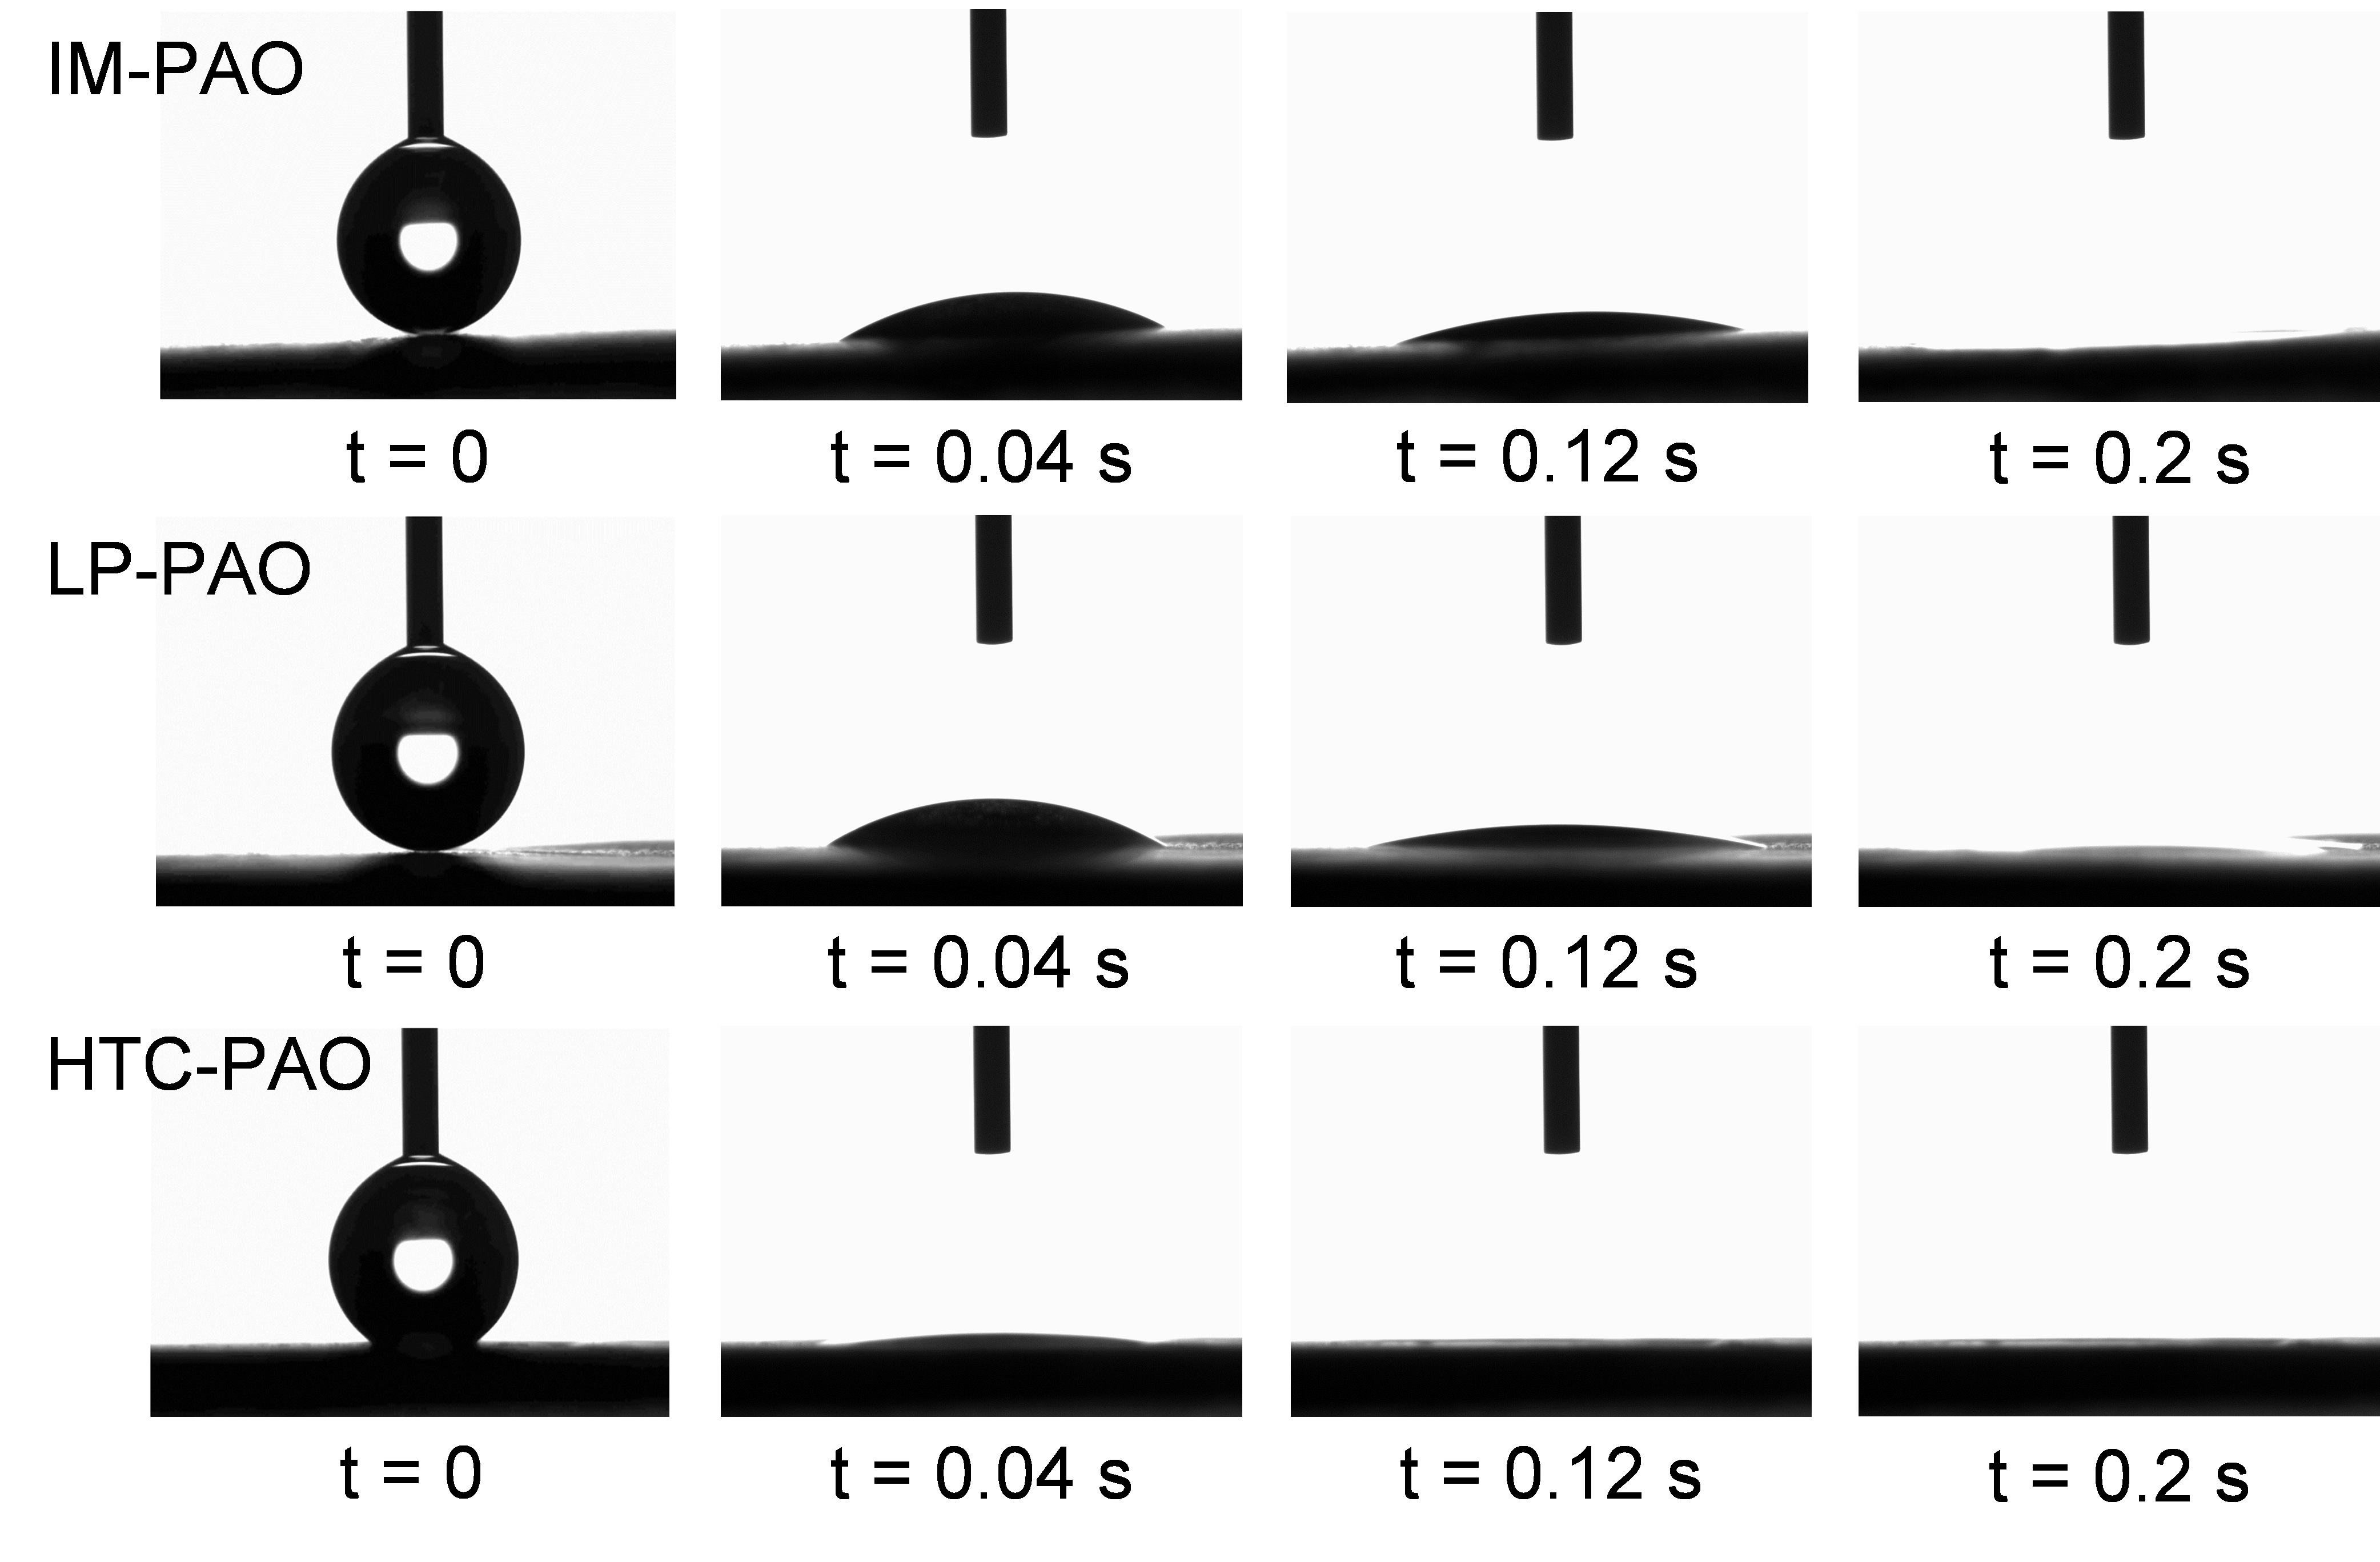


Supplementary Figure 12│Water contact angle measurements for IM-PAO, LP-PAO, and HTC-PAO.


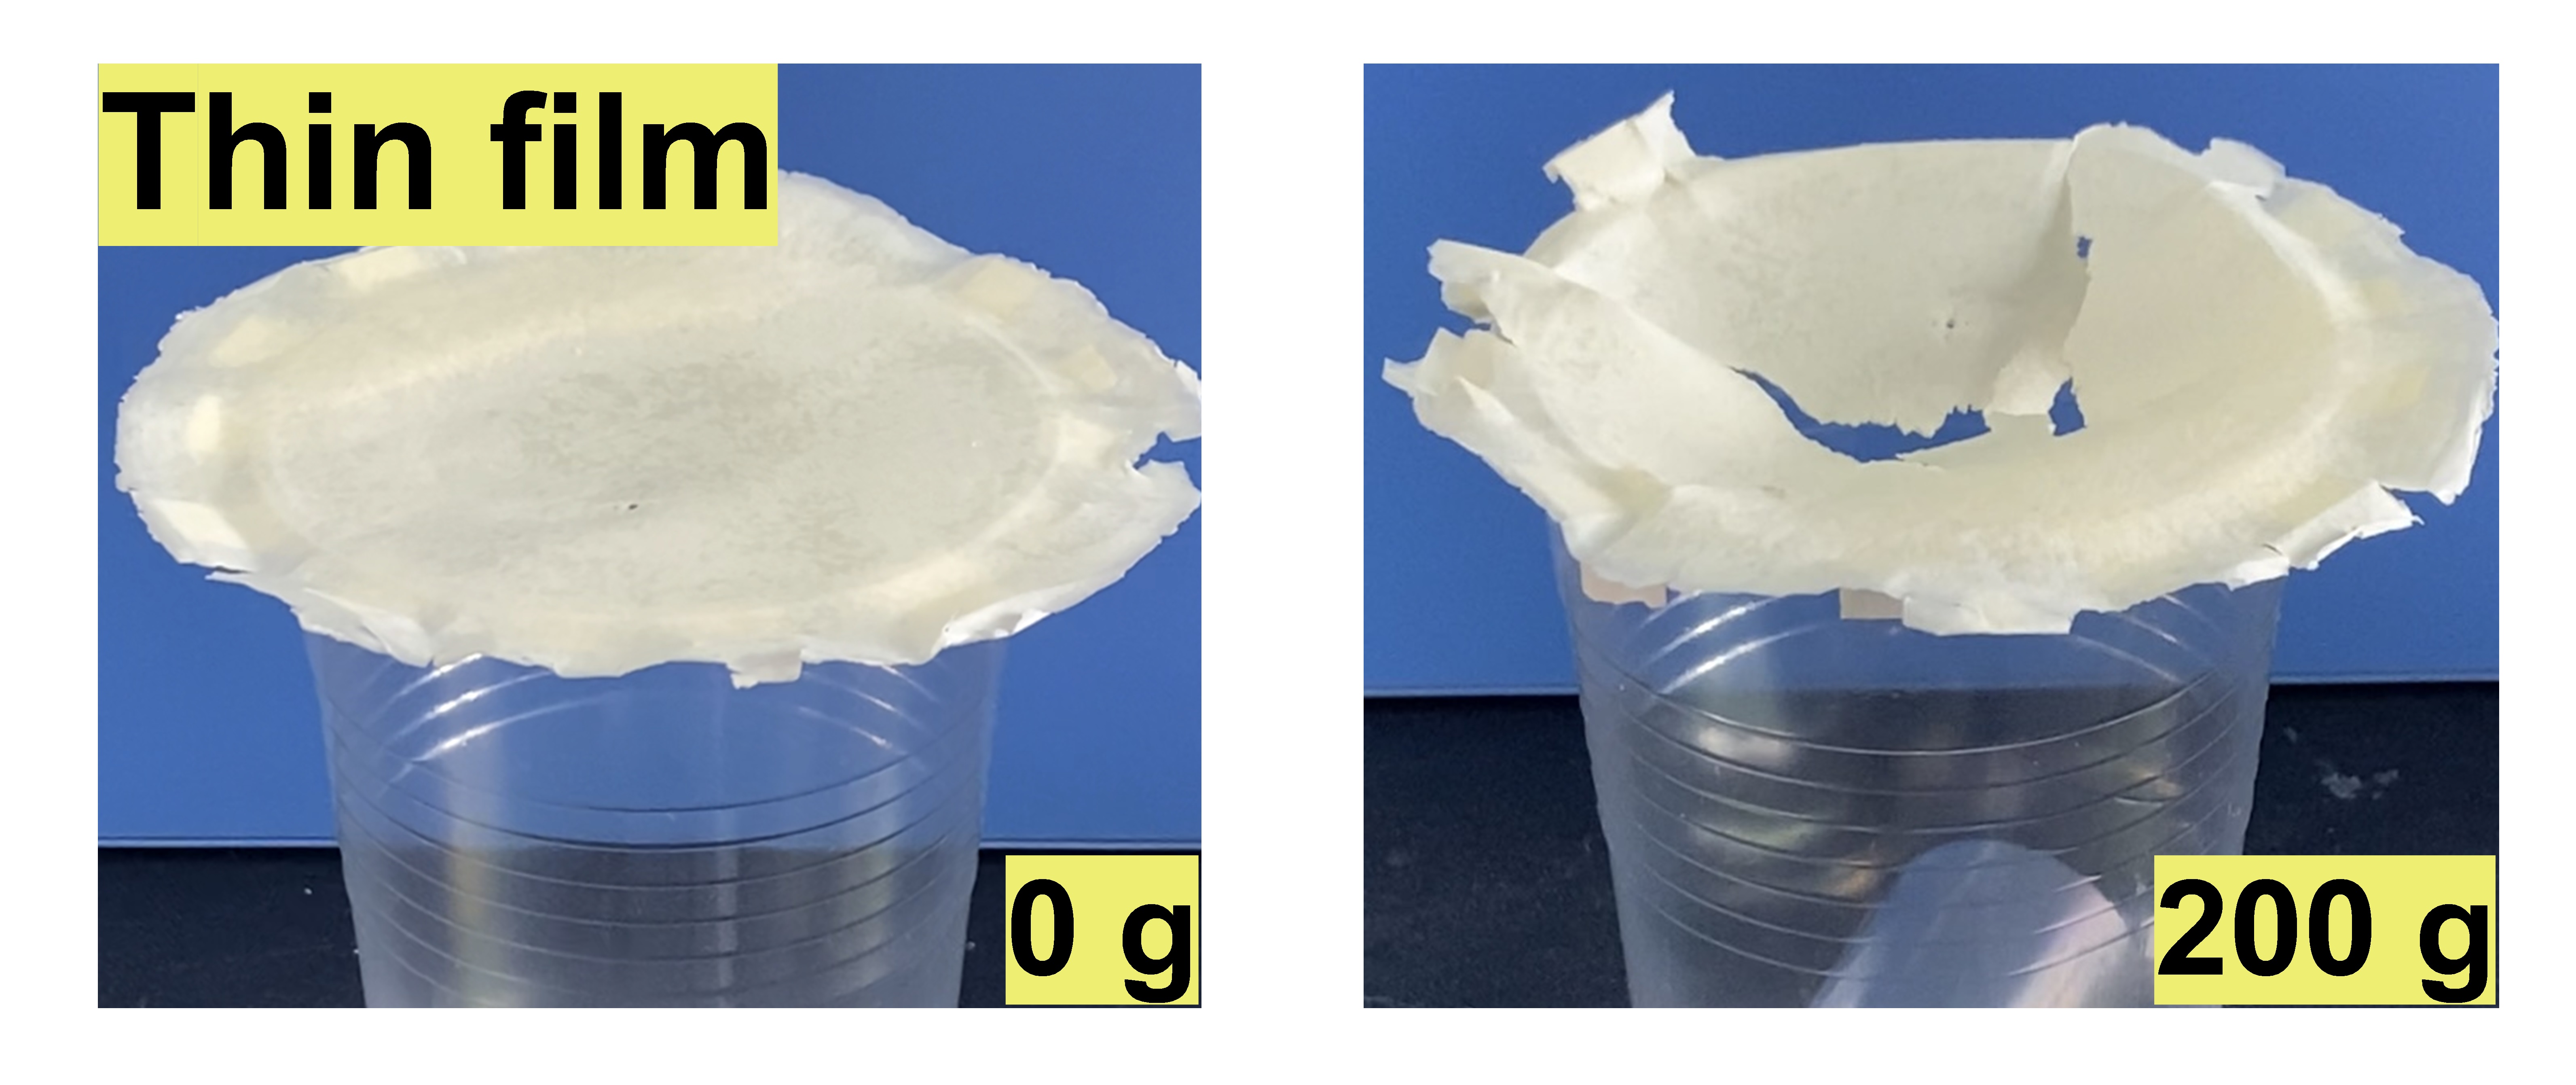


Supplementary Figure 13│Mechanical properties of thin films.

**
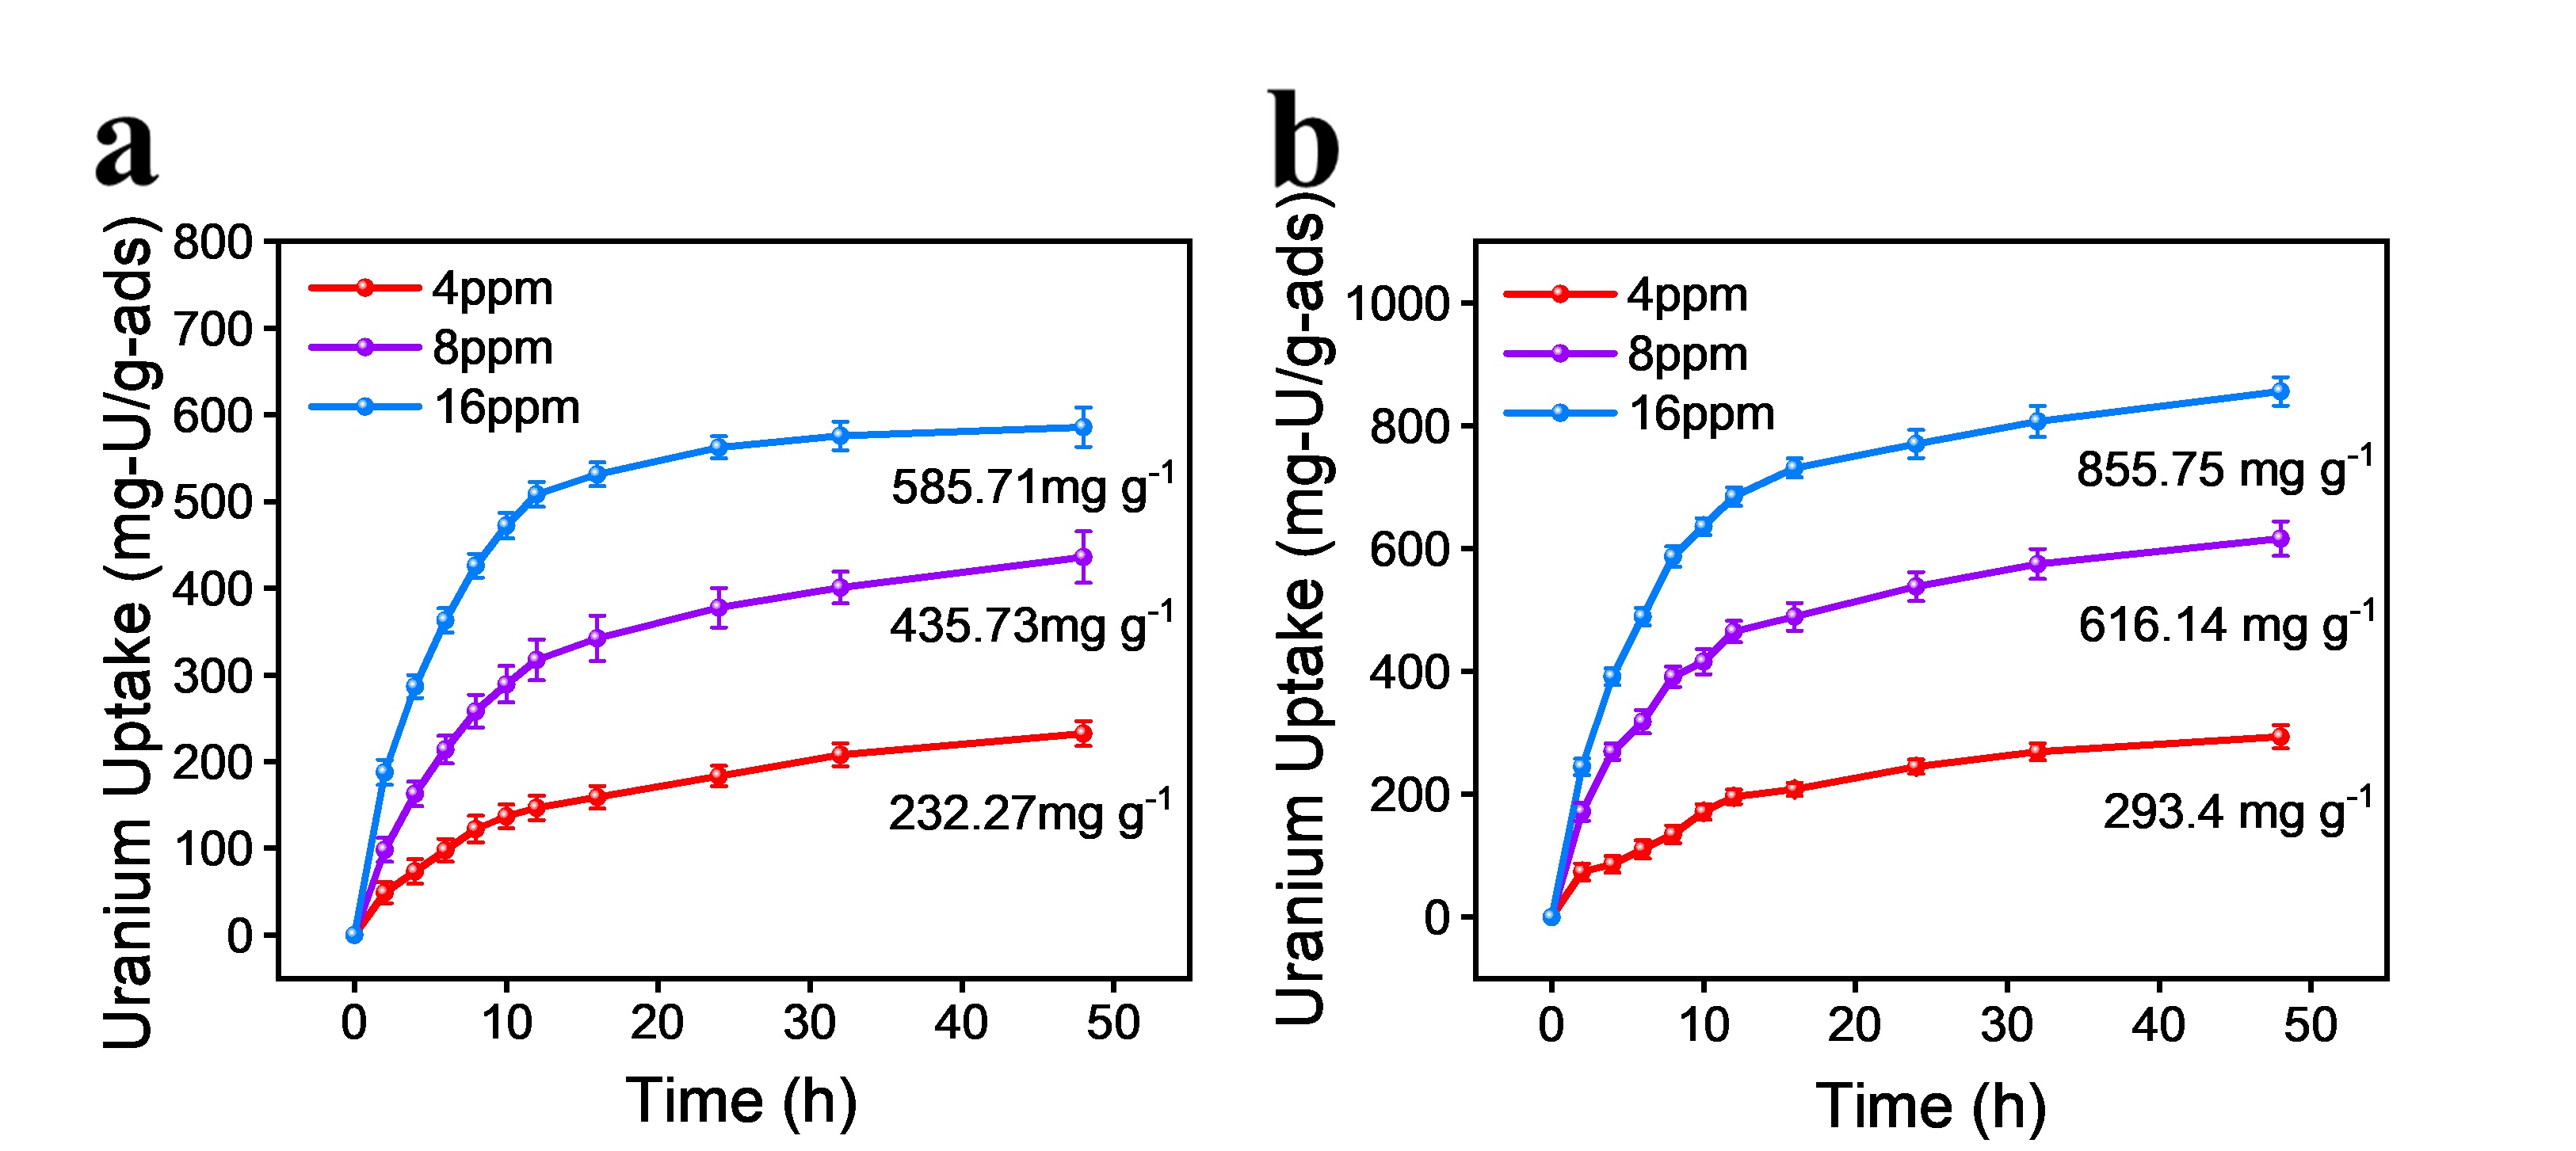
**

Supplementary Figure 14│Uranium adsorption performance of IM-PAO and LP-PAO in simulated seawater with different concentrations. (*V*, 5000 mL; *M*ads, 5 mg).


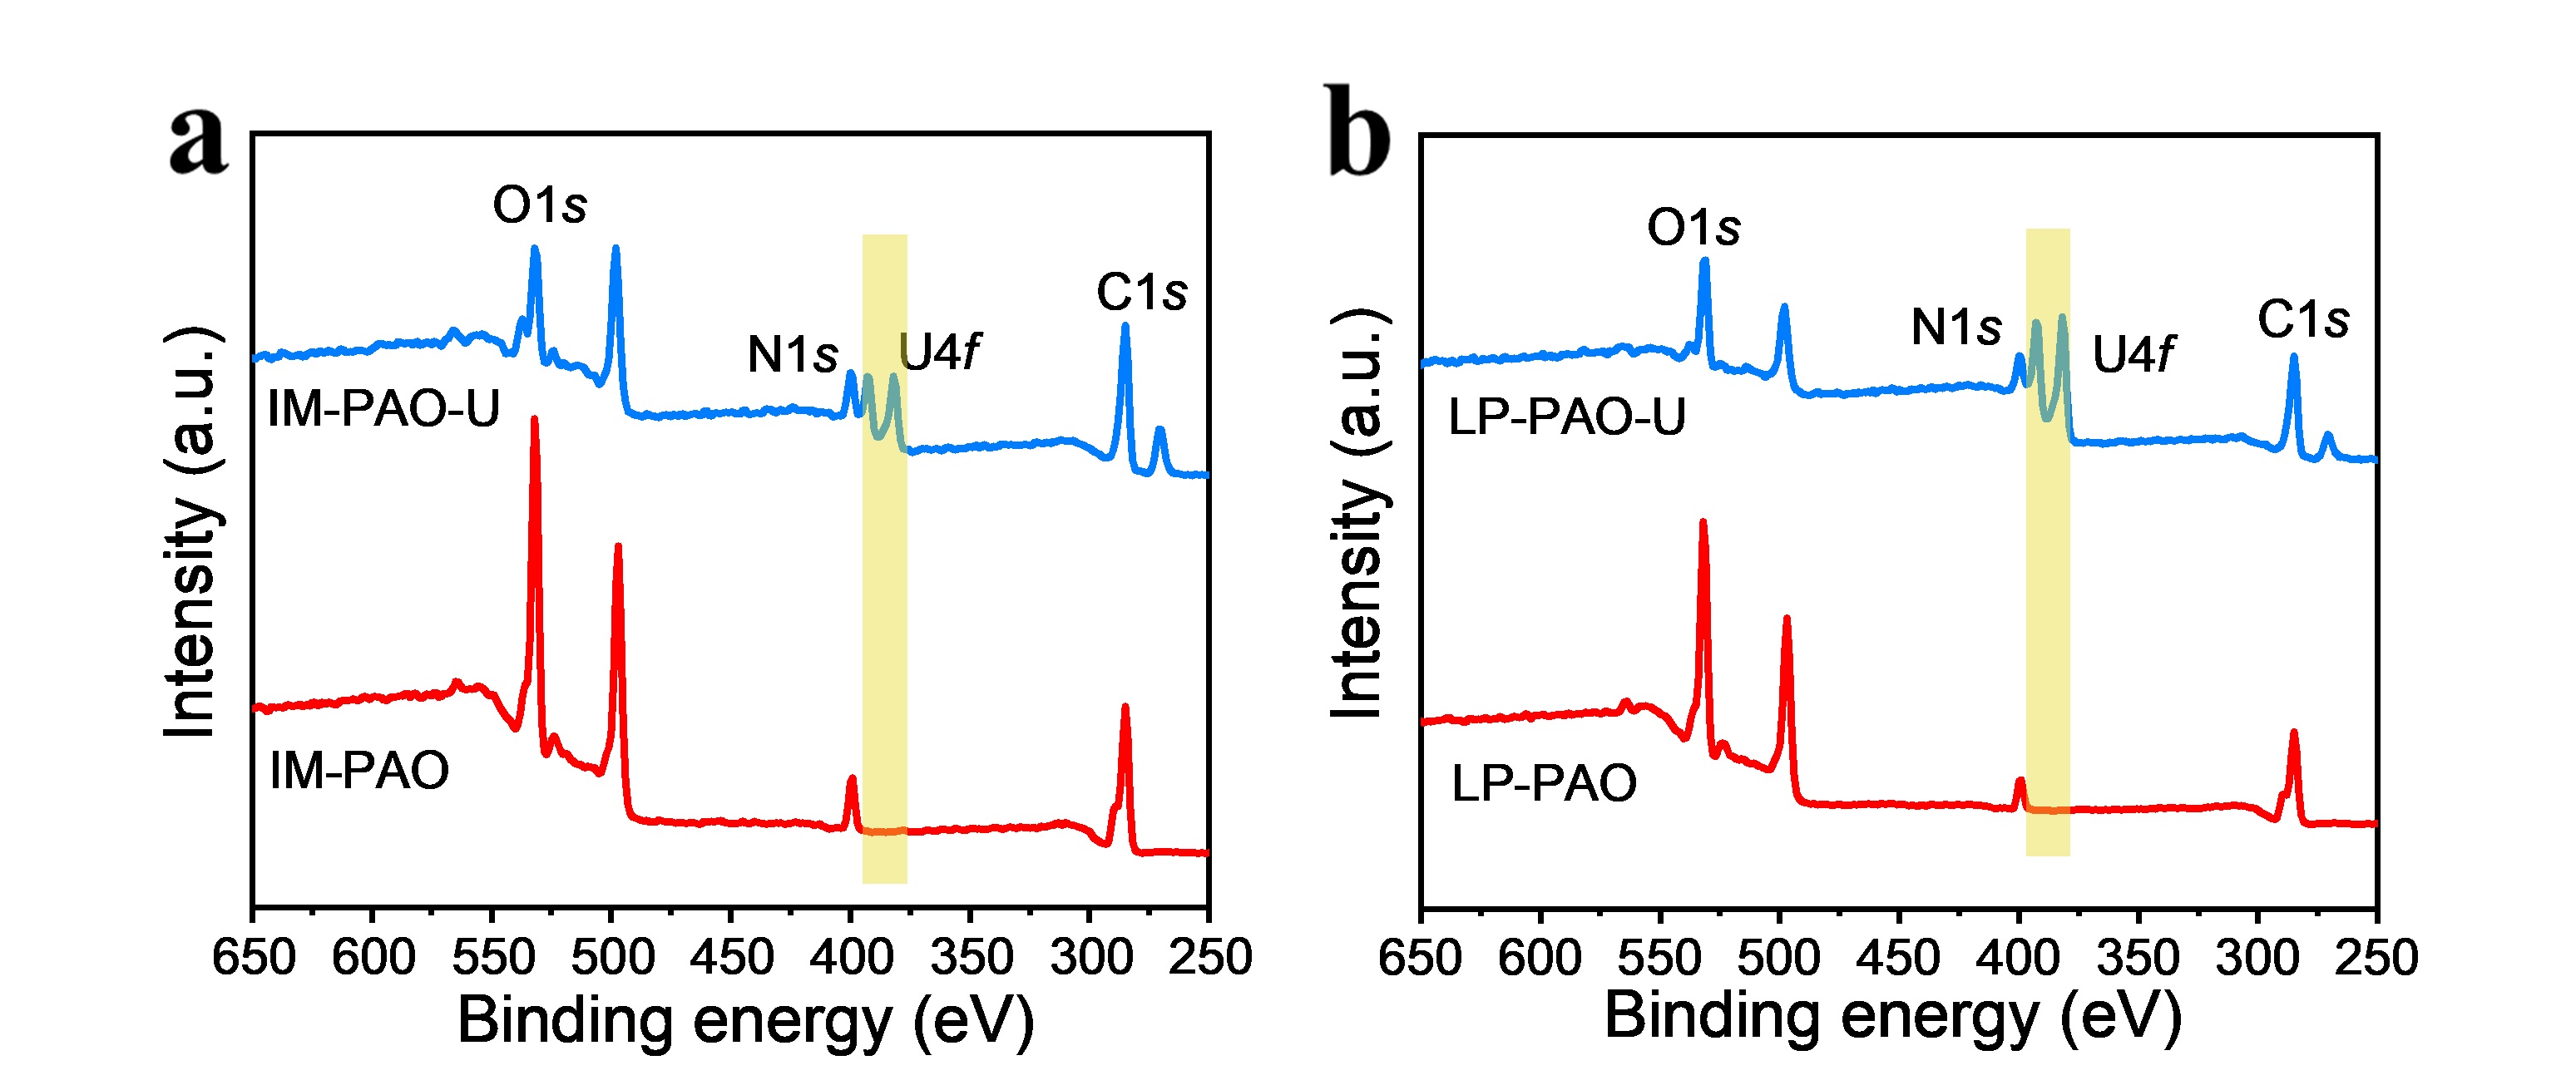


Supplementary Figure 15│XPS spectra of IM-PAO and LP-PAO before and after uranium adsorption.


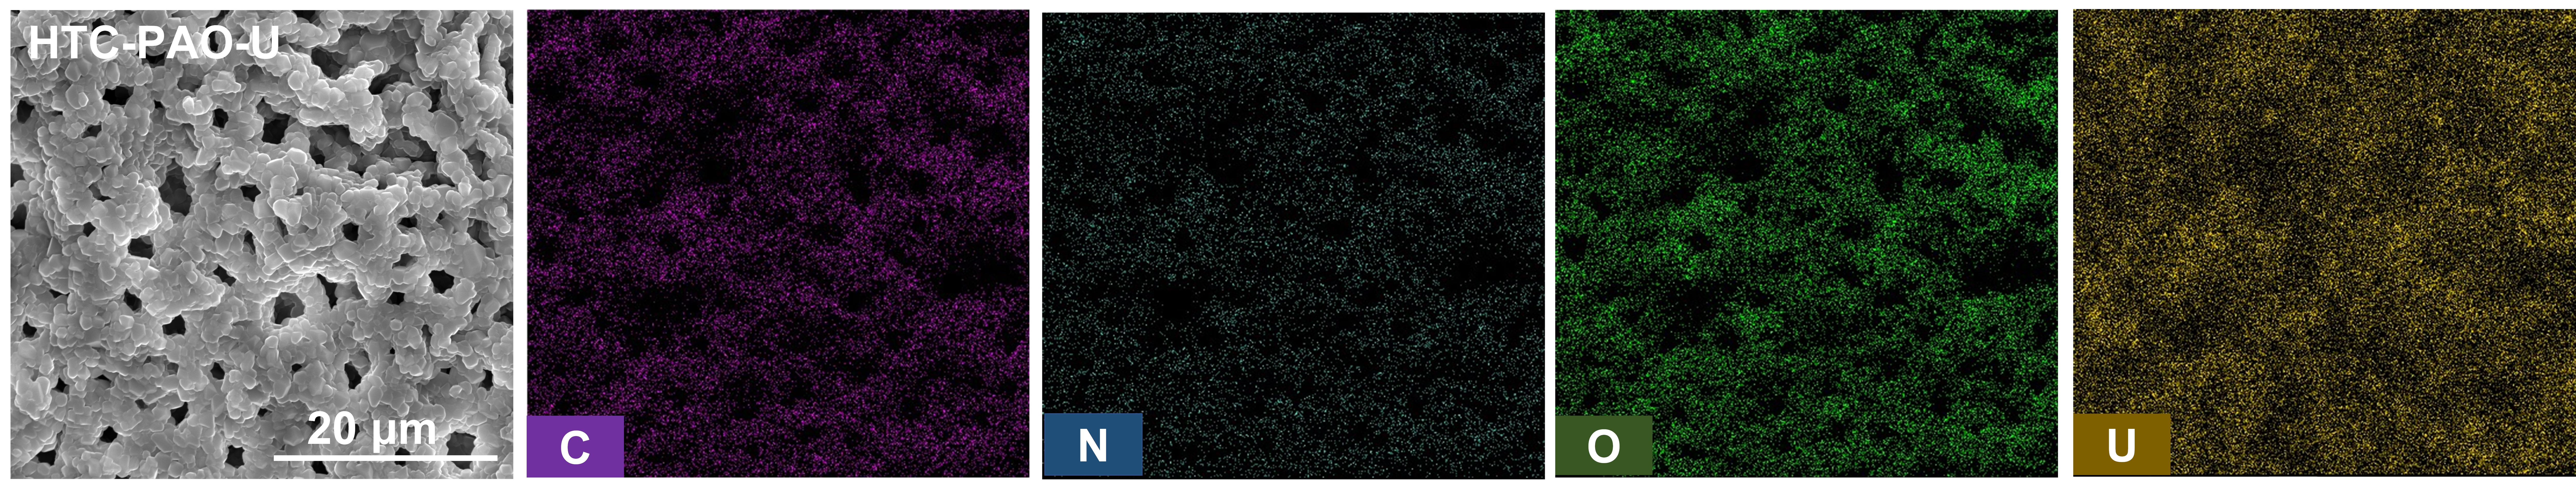


Supplementary Figure 16│EDS mapping of HTC-PAO following uranium adsorption.

**
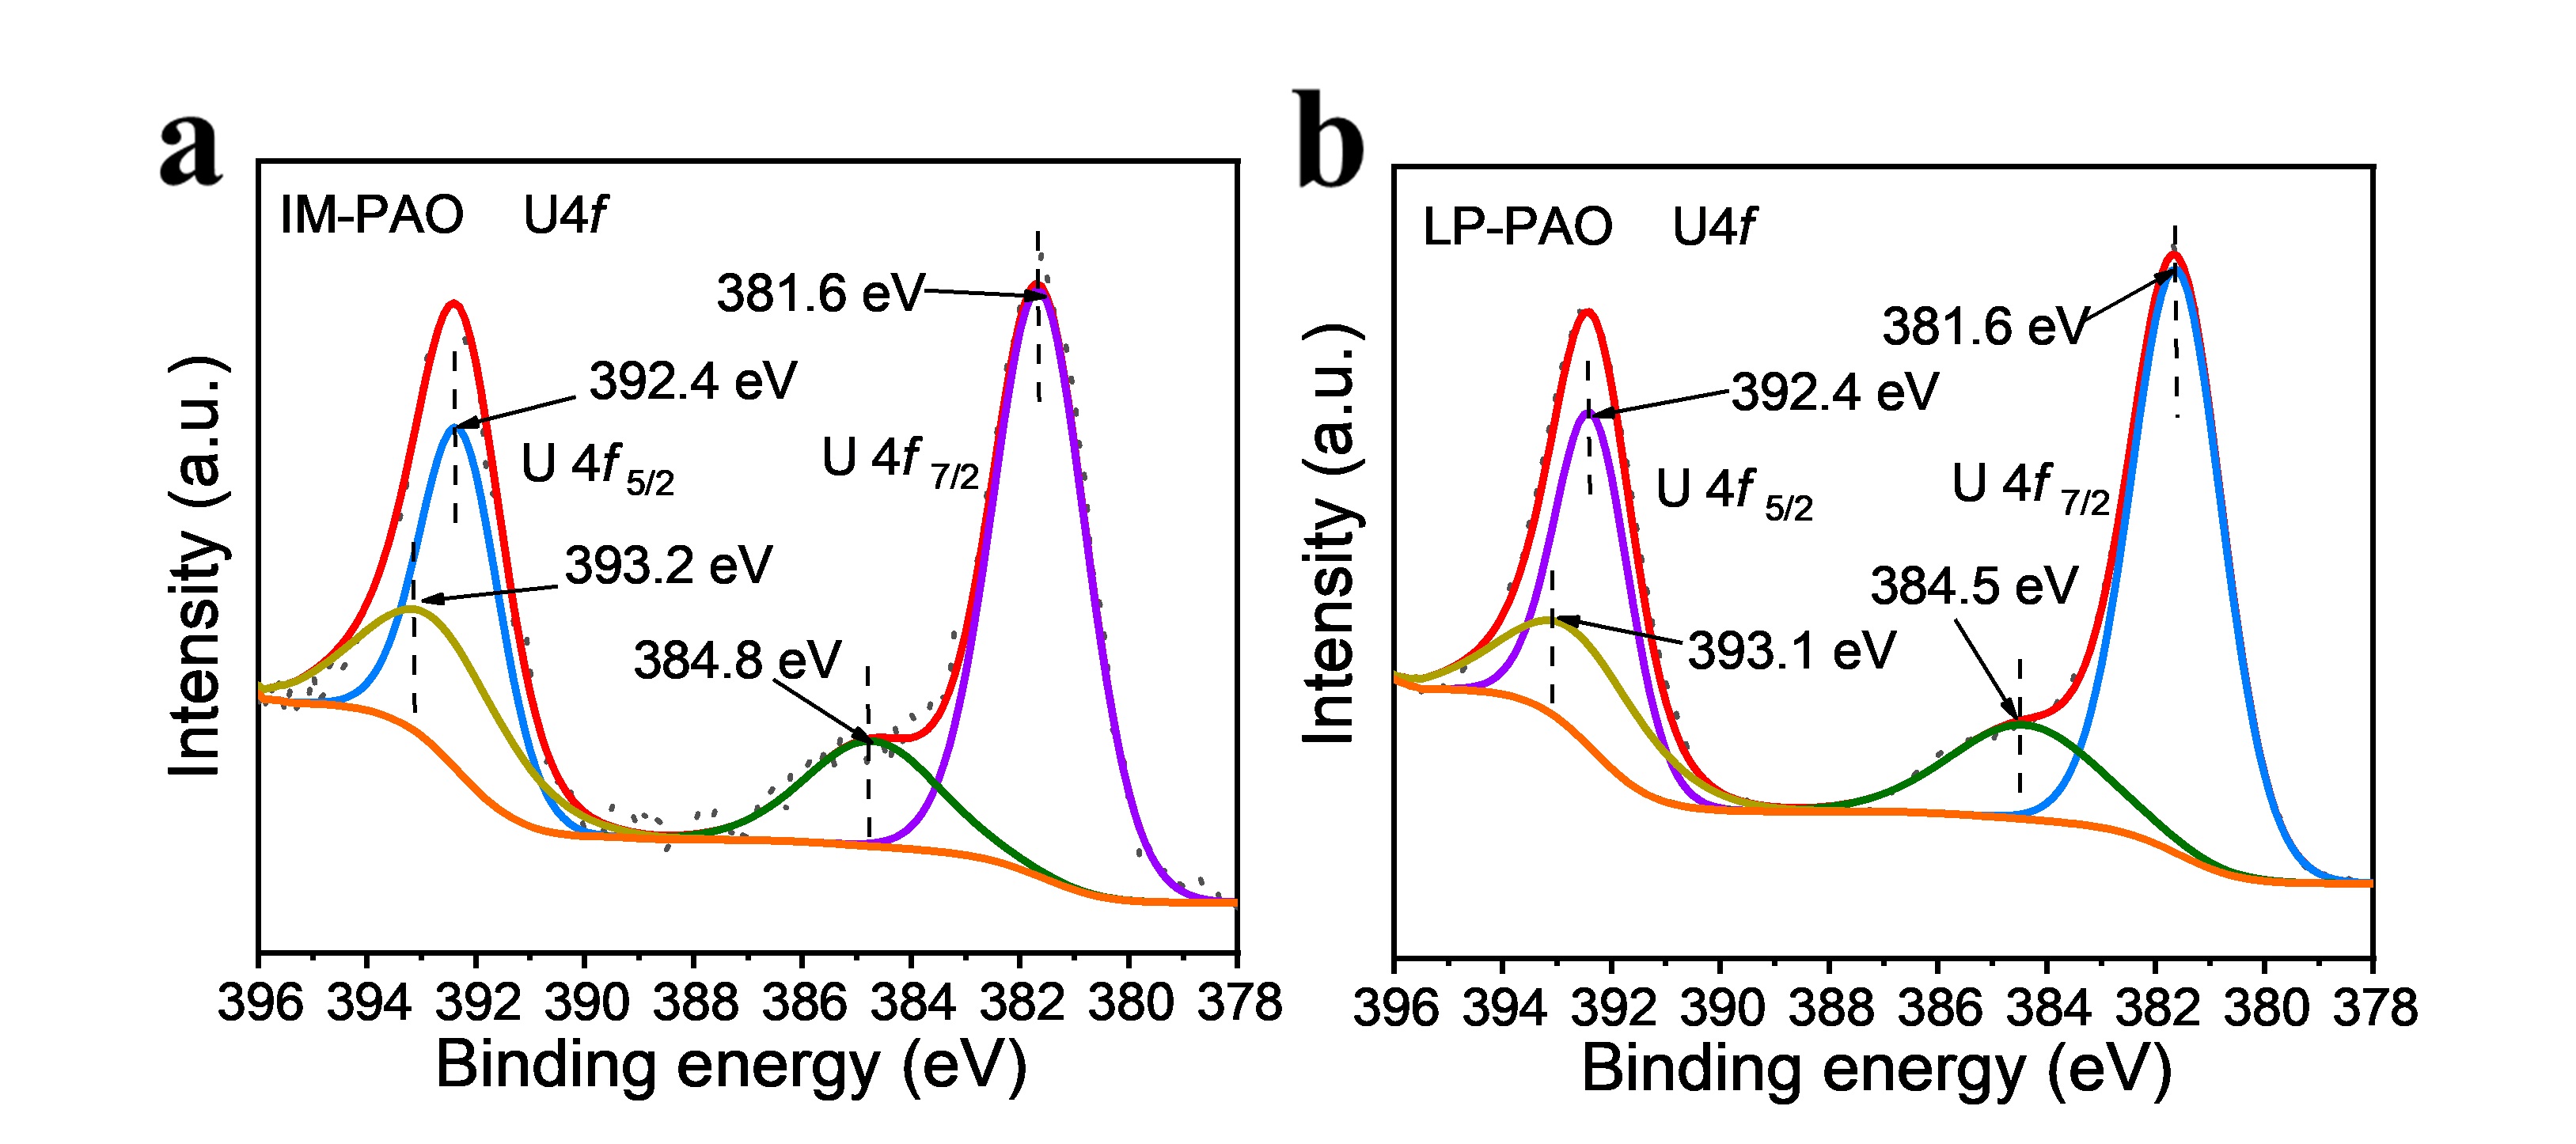
**

Supplementary Figure 17│High-resolution U4f XPS spectra of the IM-PAO and LP-PAO.

**
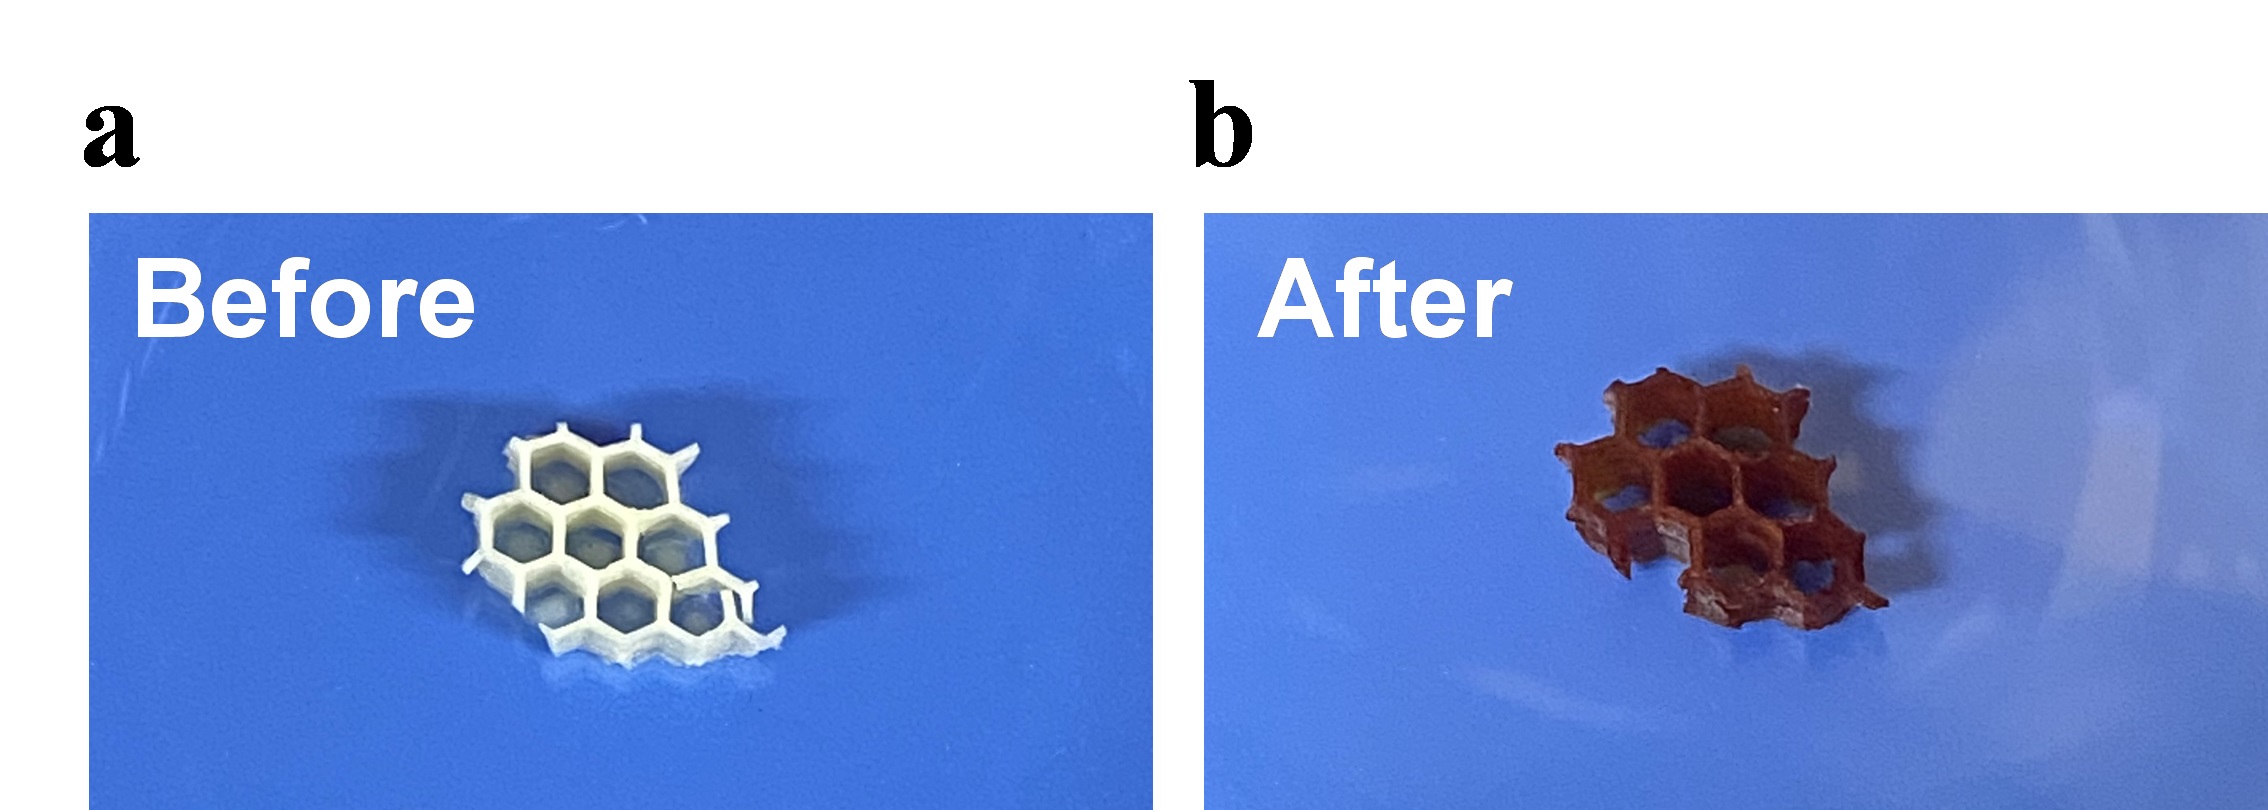
**

Supplementary Figure 18│Digital photographs of the HTC-PAO before and after uranium adsorption.

**
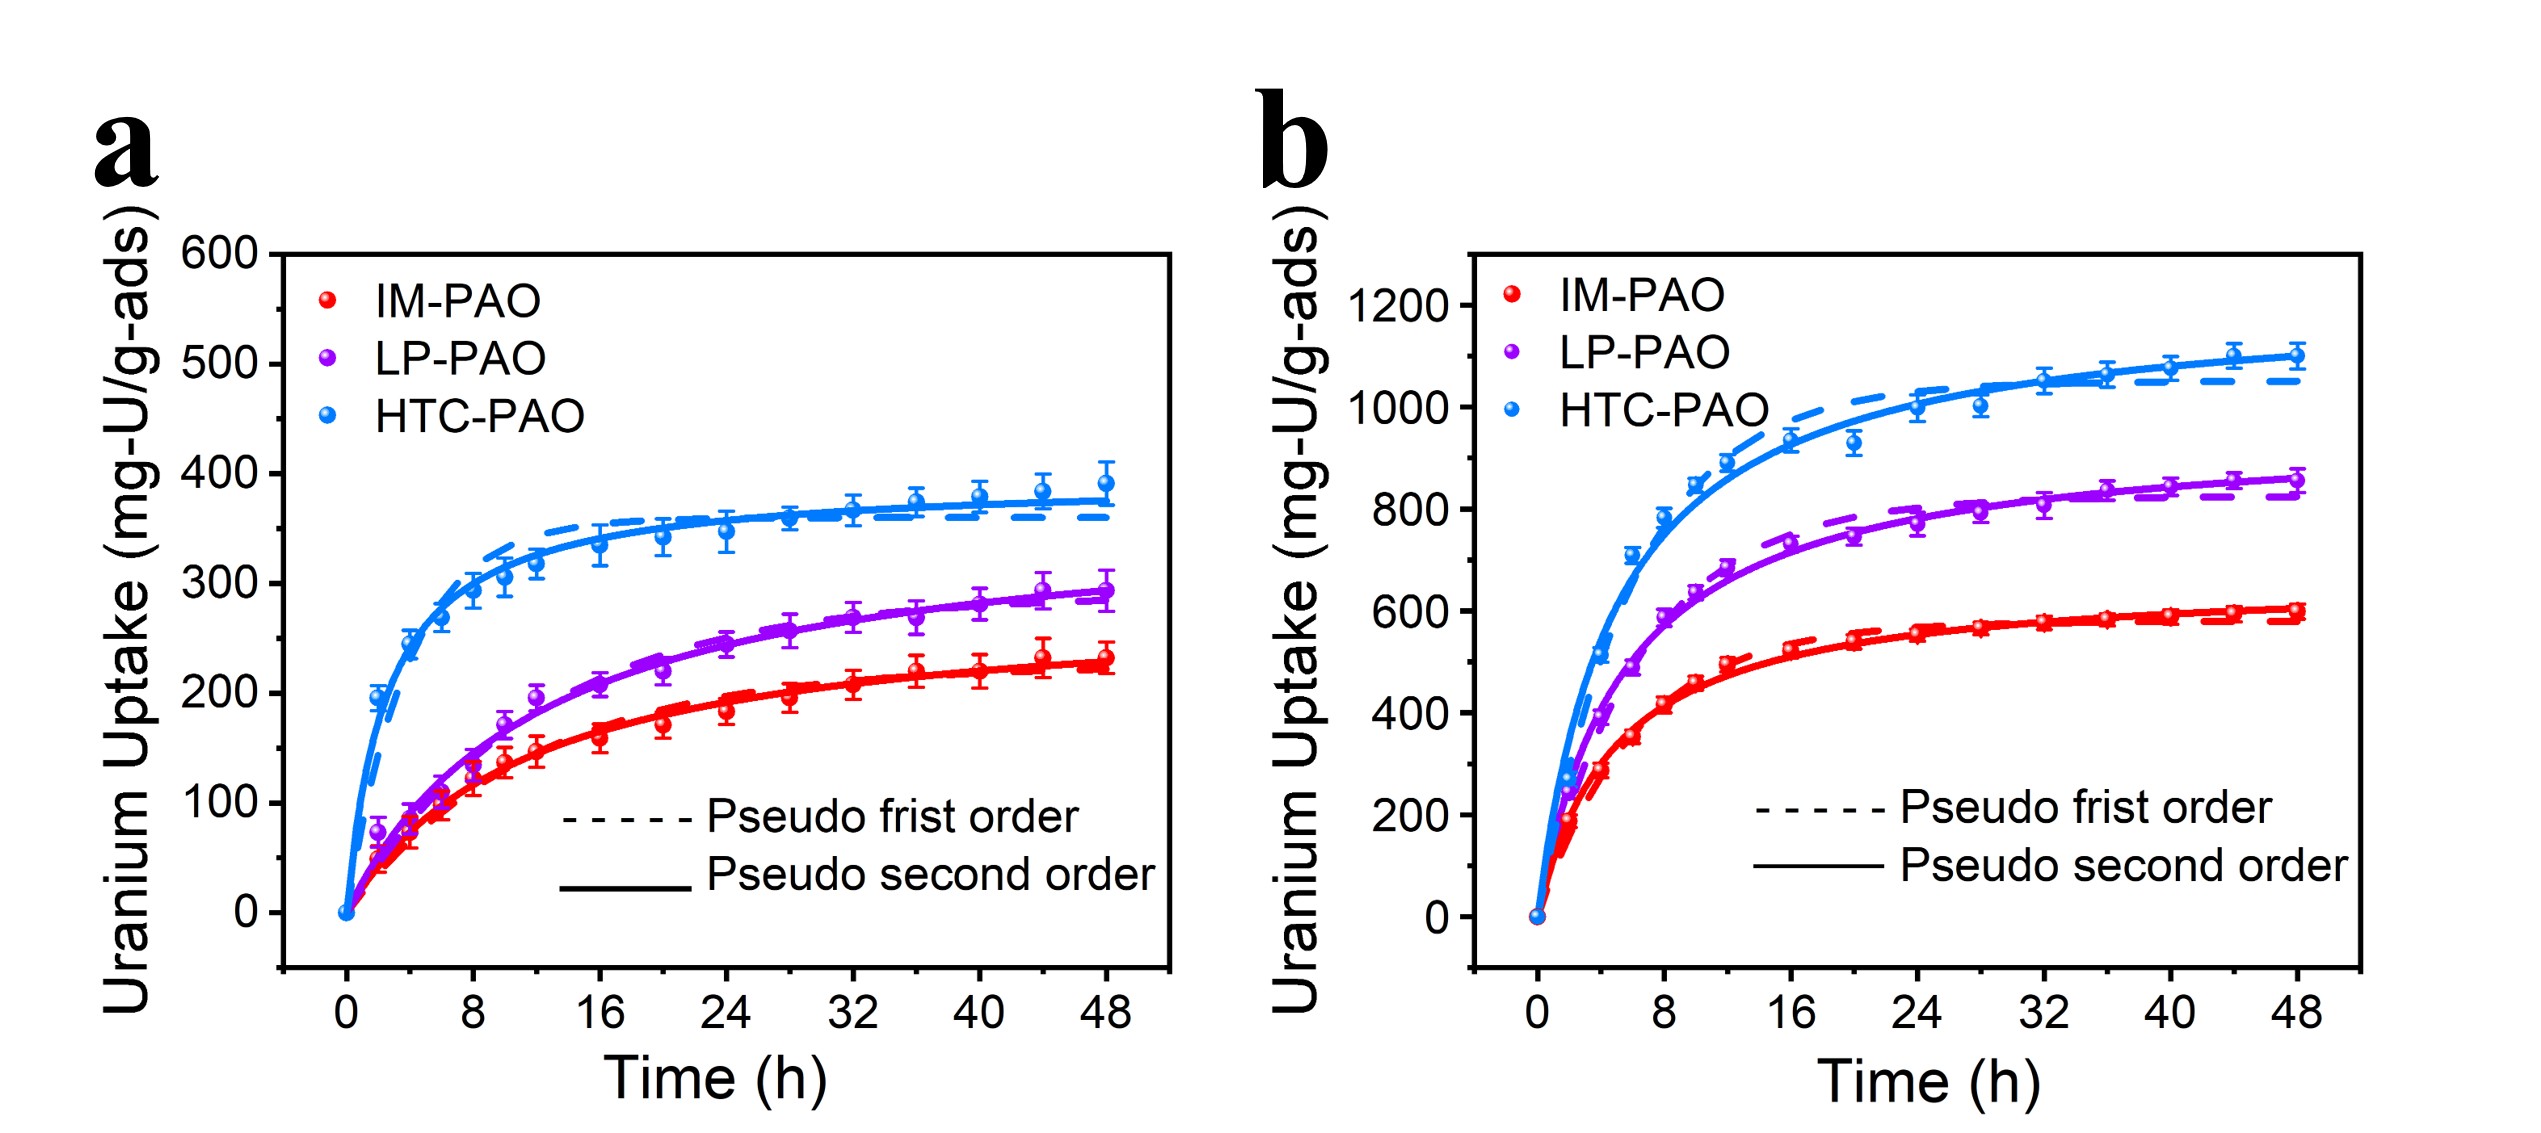
**

Supplementary Figure 19│Uranium adsorption kinetic data and corresponding fitting curves based on Pseudo first order and Pseudo second order models for IM-PAO, LP-PAO and HTC-PAO. (*C*0, 4 ppm,16ppm; *V*, 5000 mL; *M*ads, 5 mg).


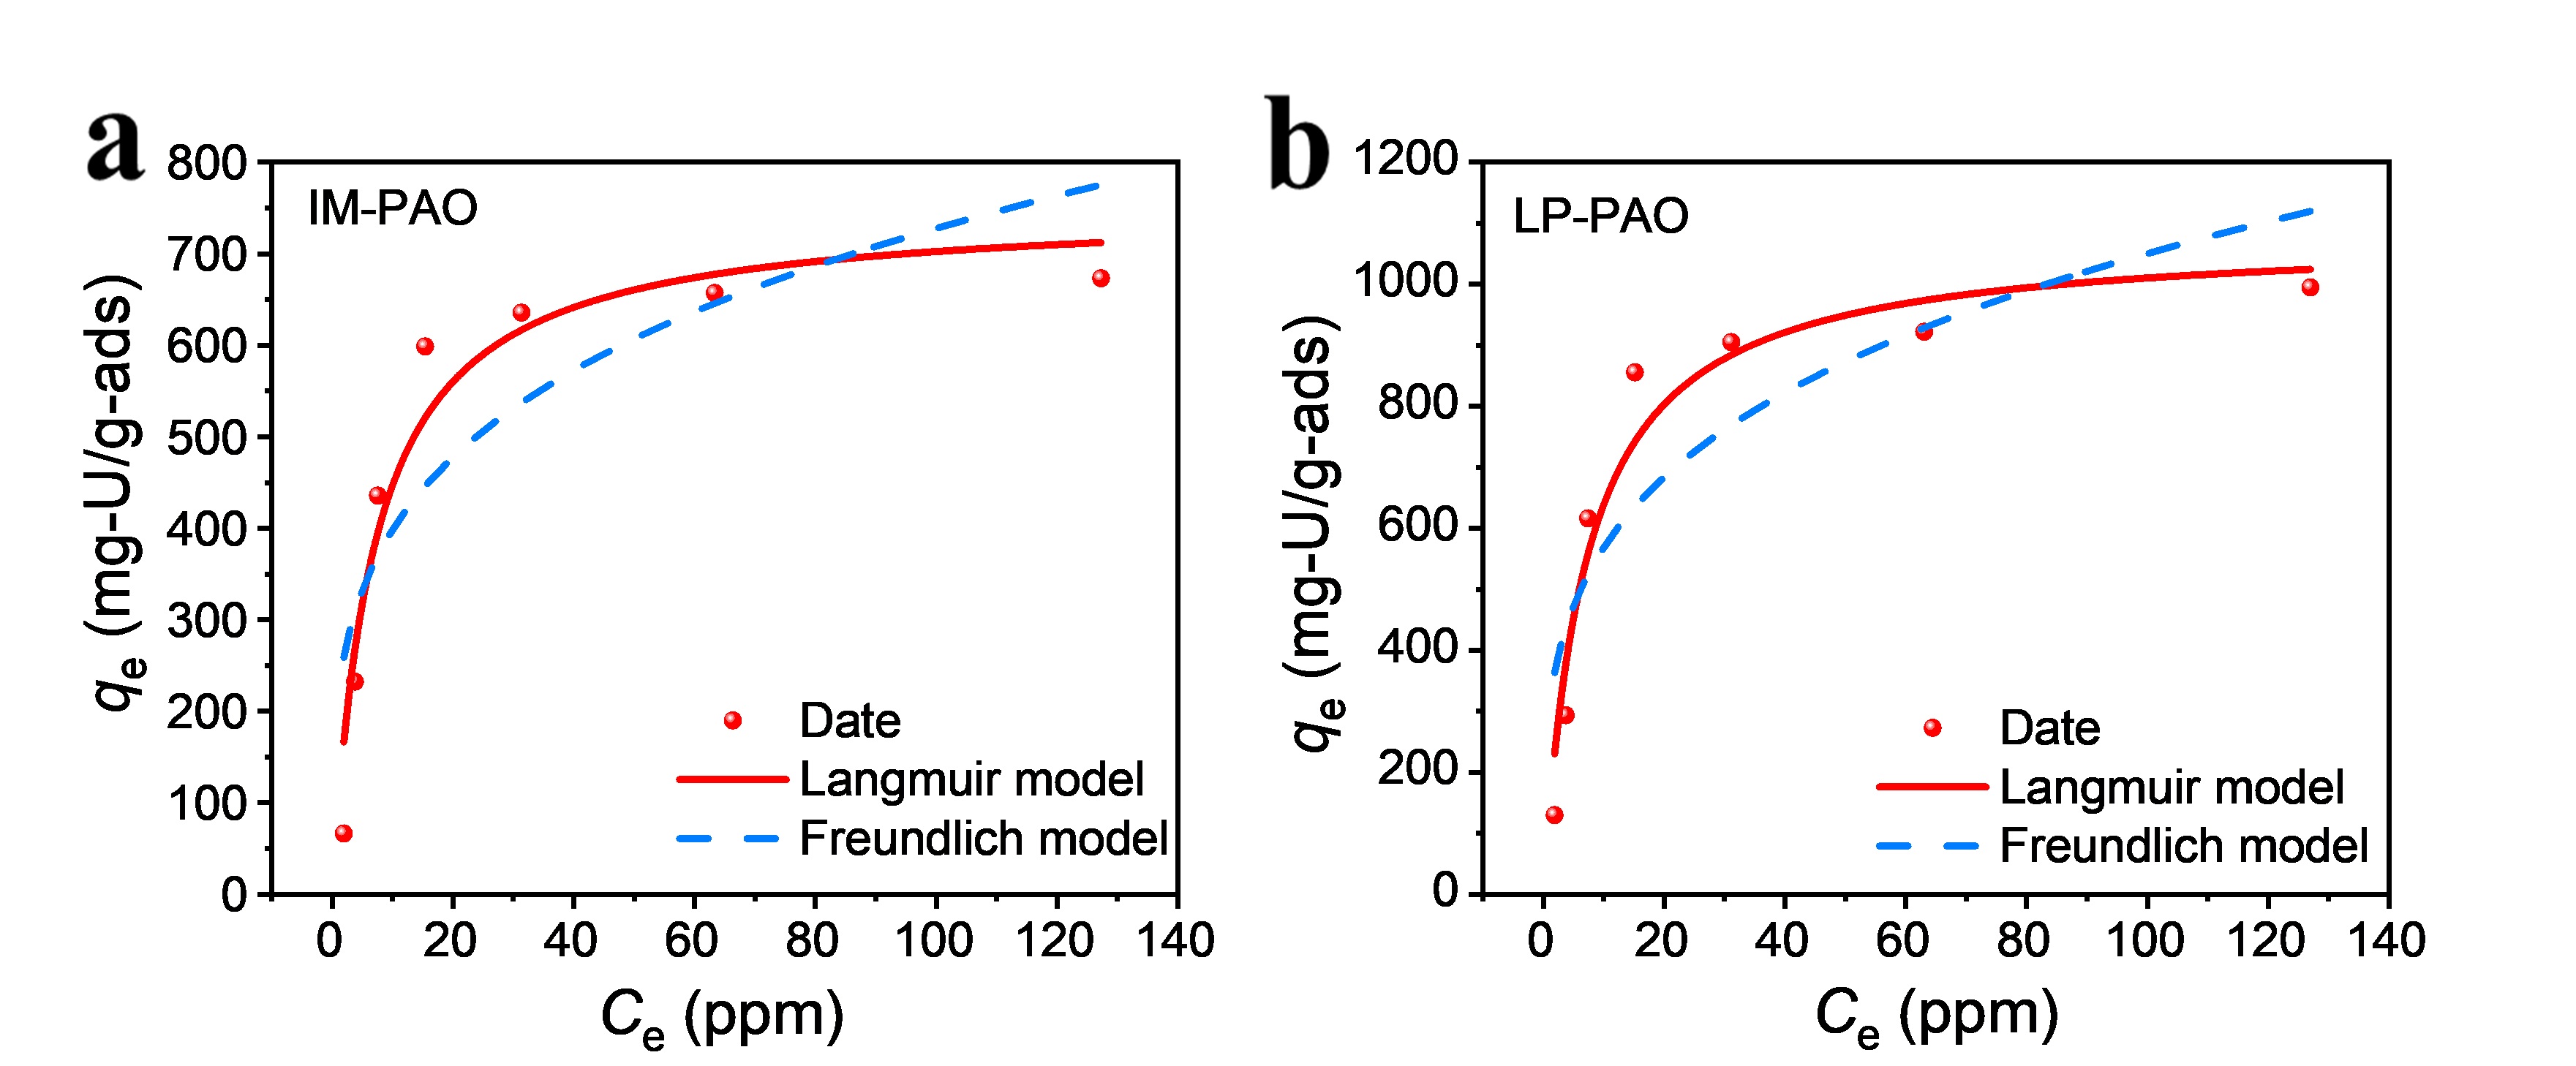


Supplementary Figure 20│Equilibrium adsorption isotherm and the corresponding fitting curves based on Freundlich model and Langmuir model for IM-PAO and LP-PAO.

**
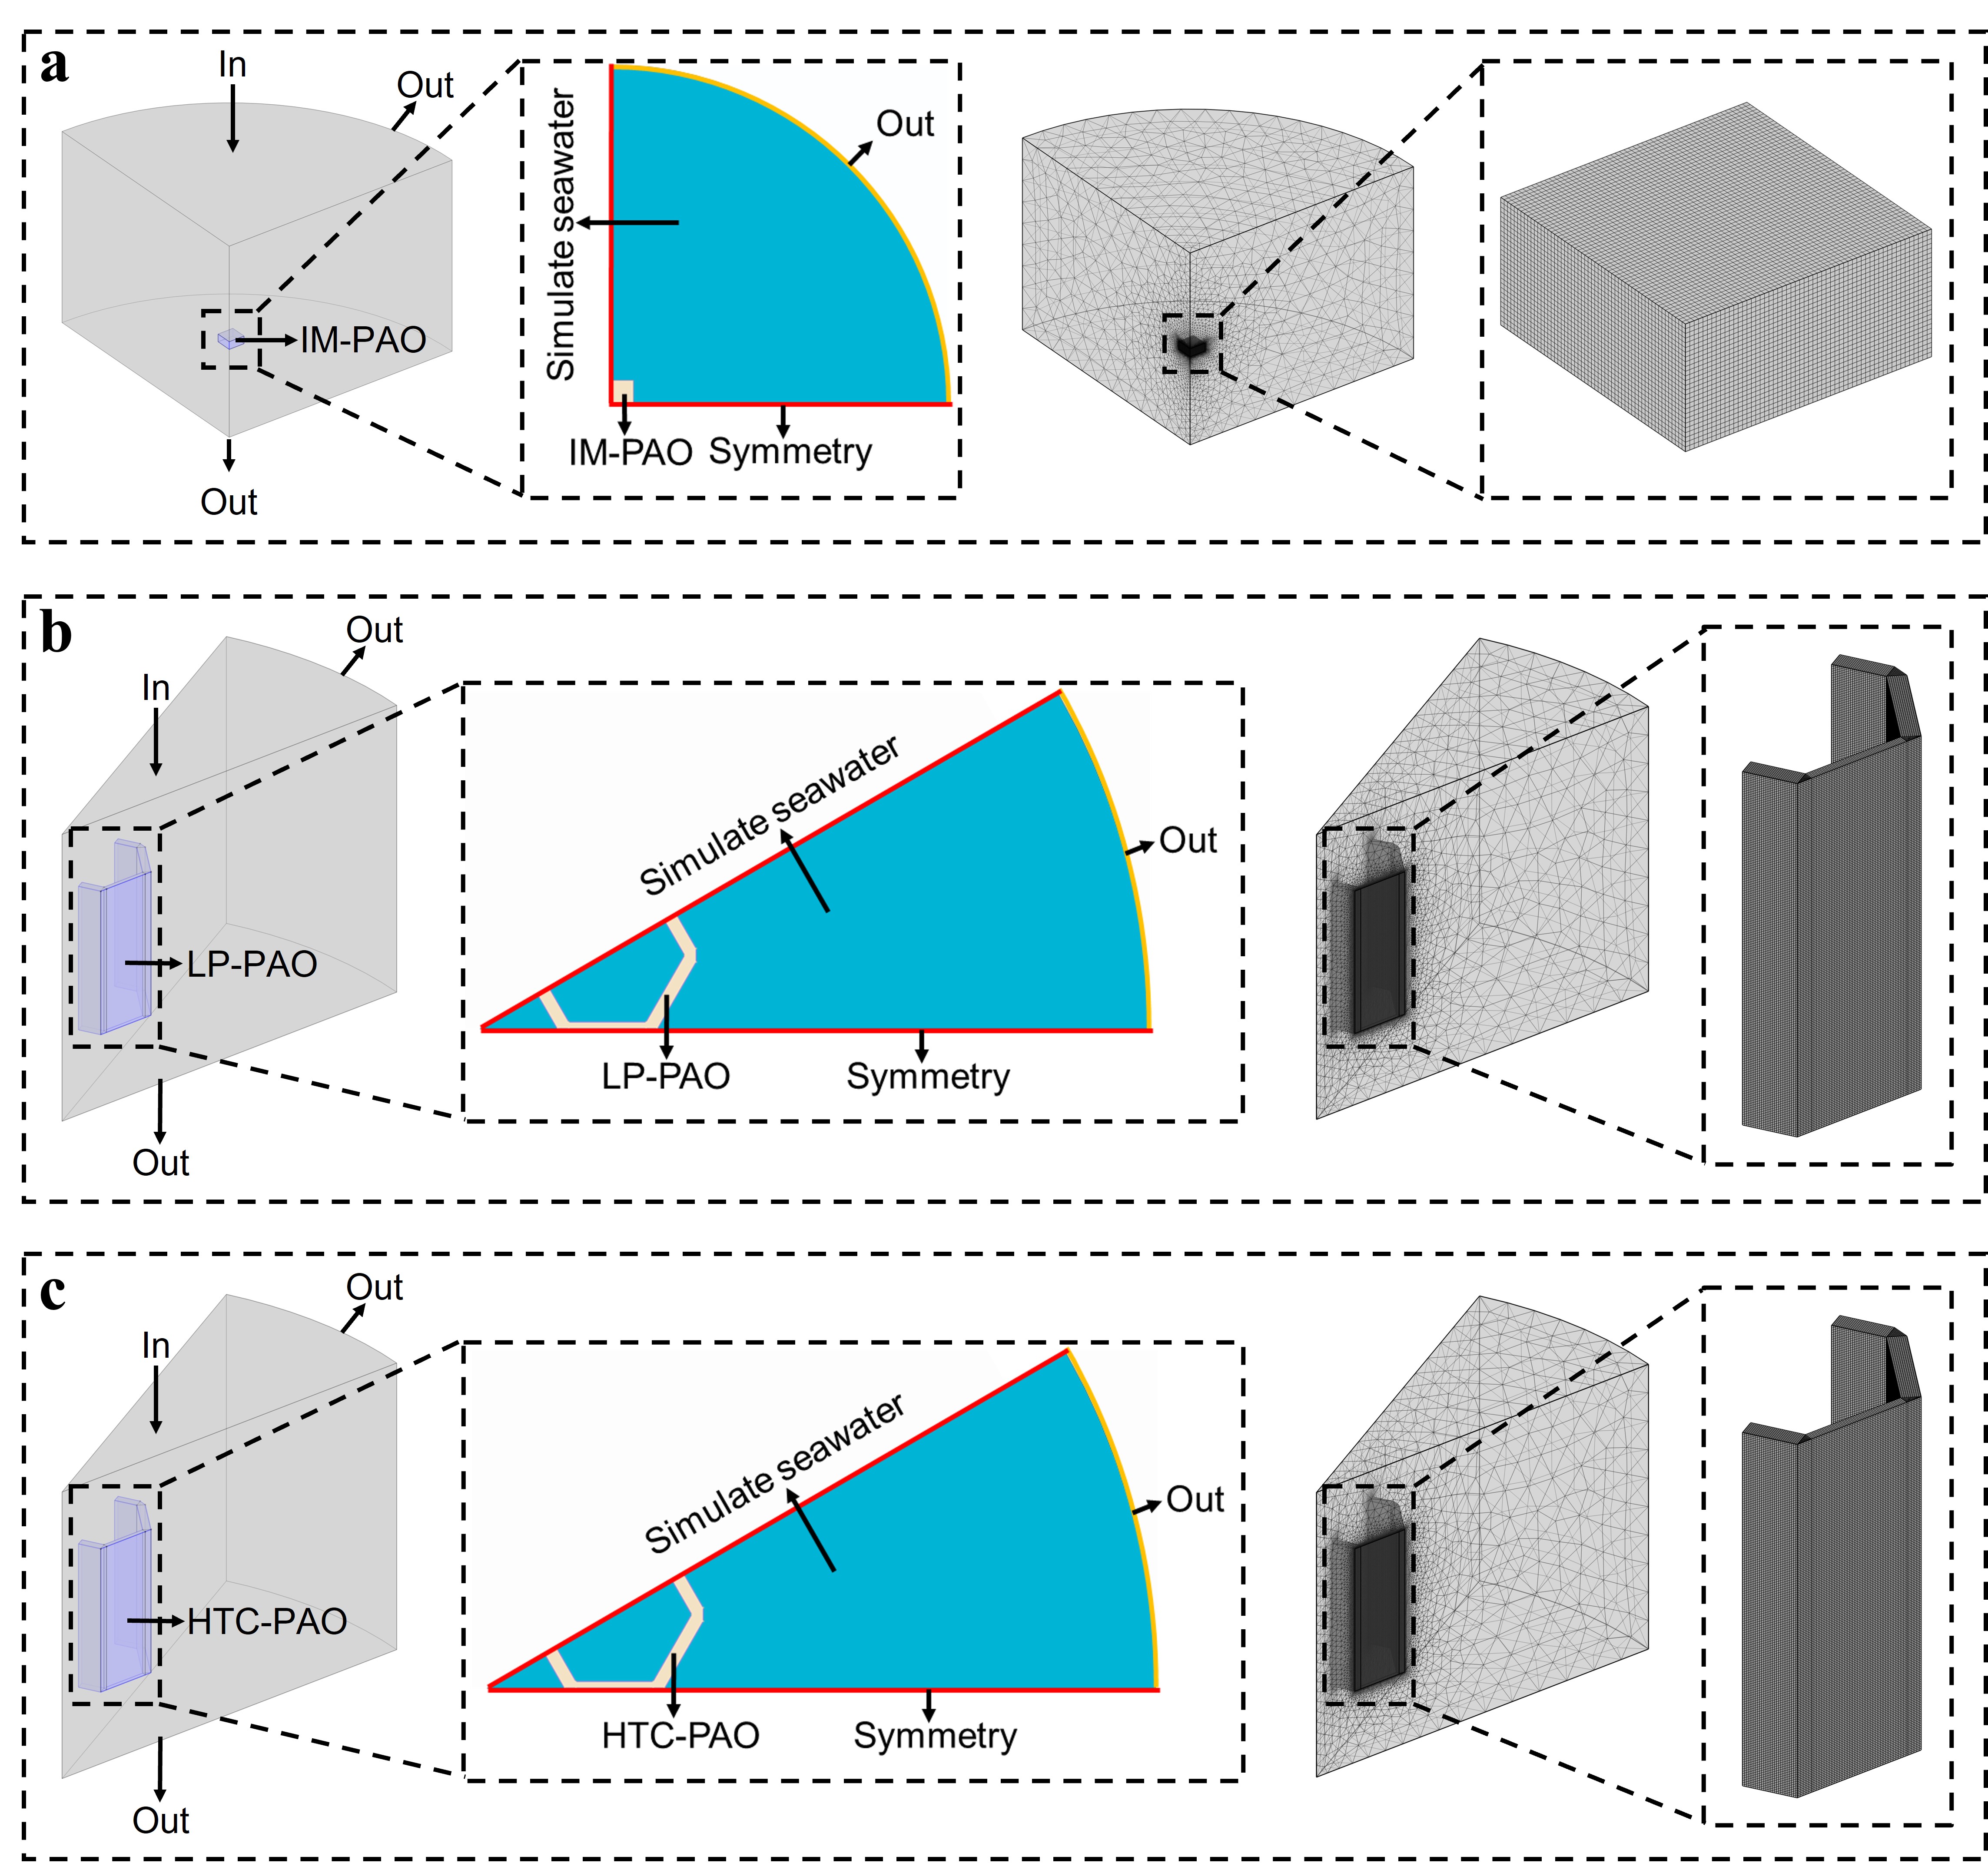
**

Supplementary Figure 21│Model establishment and mesh division of IM-PAO, LP-PAO and HTC-PAO.

Supplementary Figure 22│Performance of Cycle Adsorption in HTC-PAO.

**
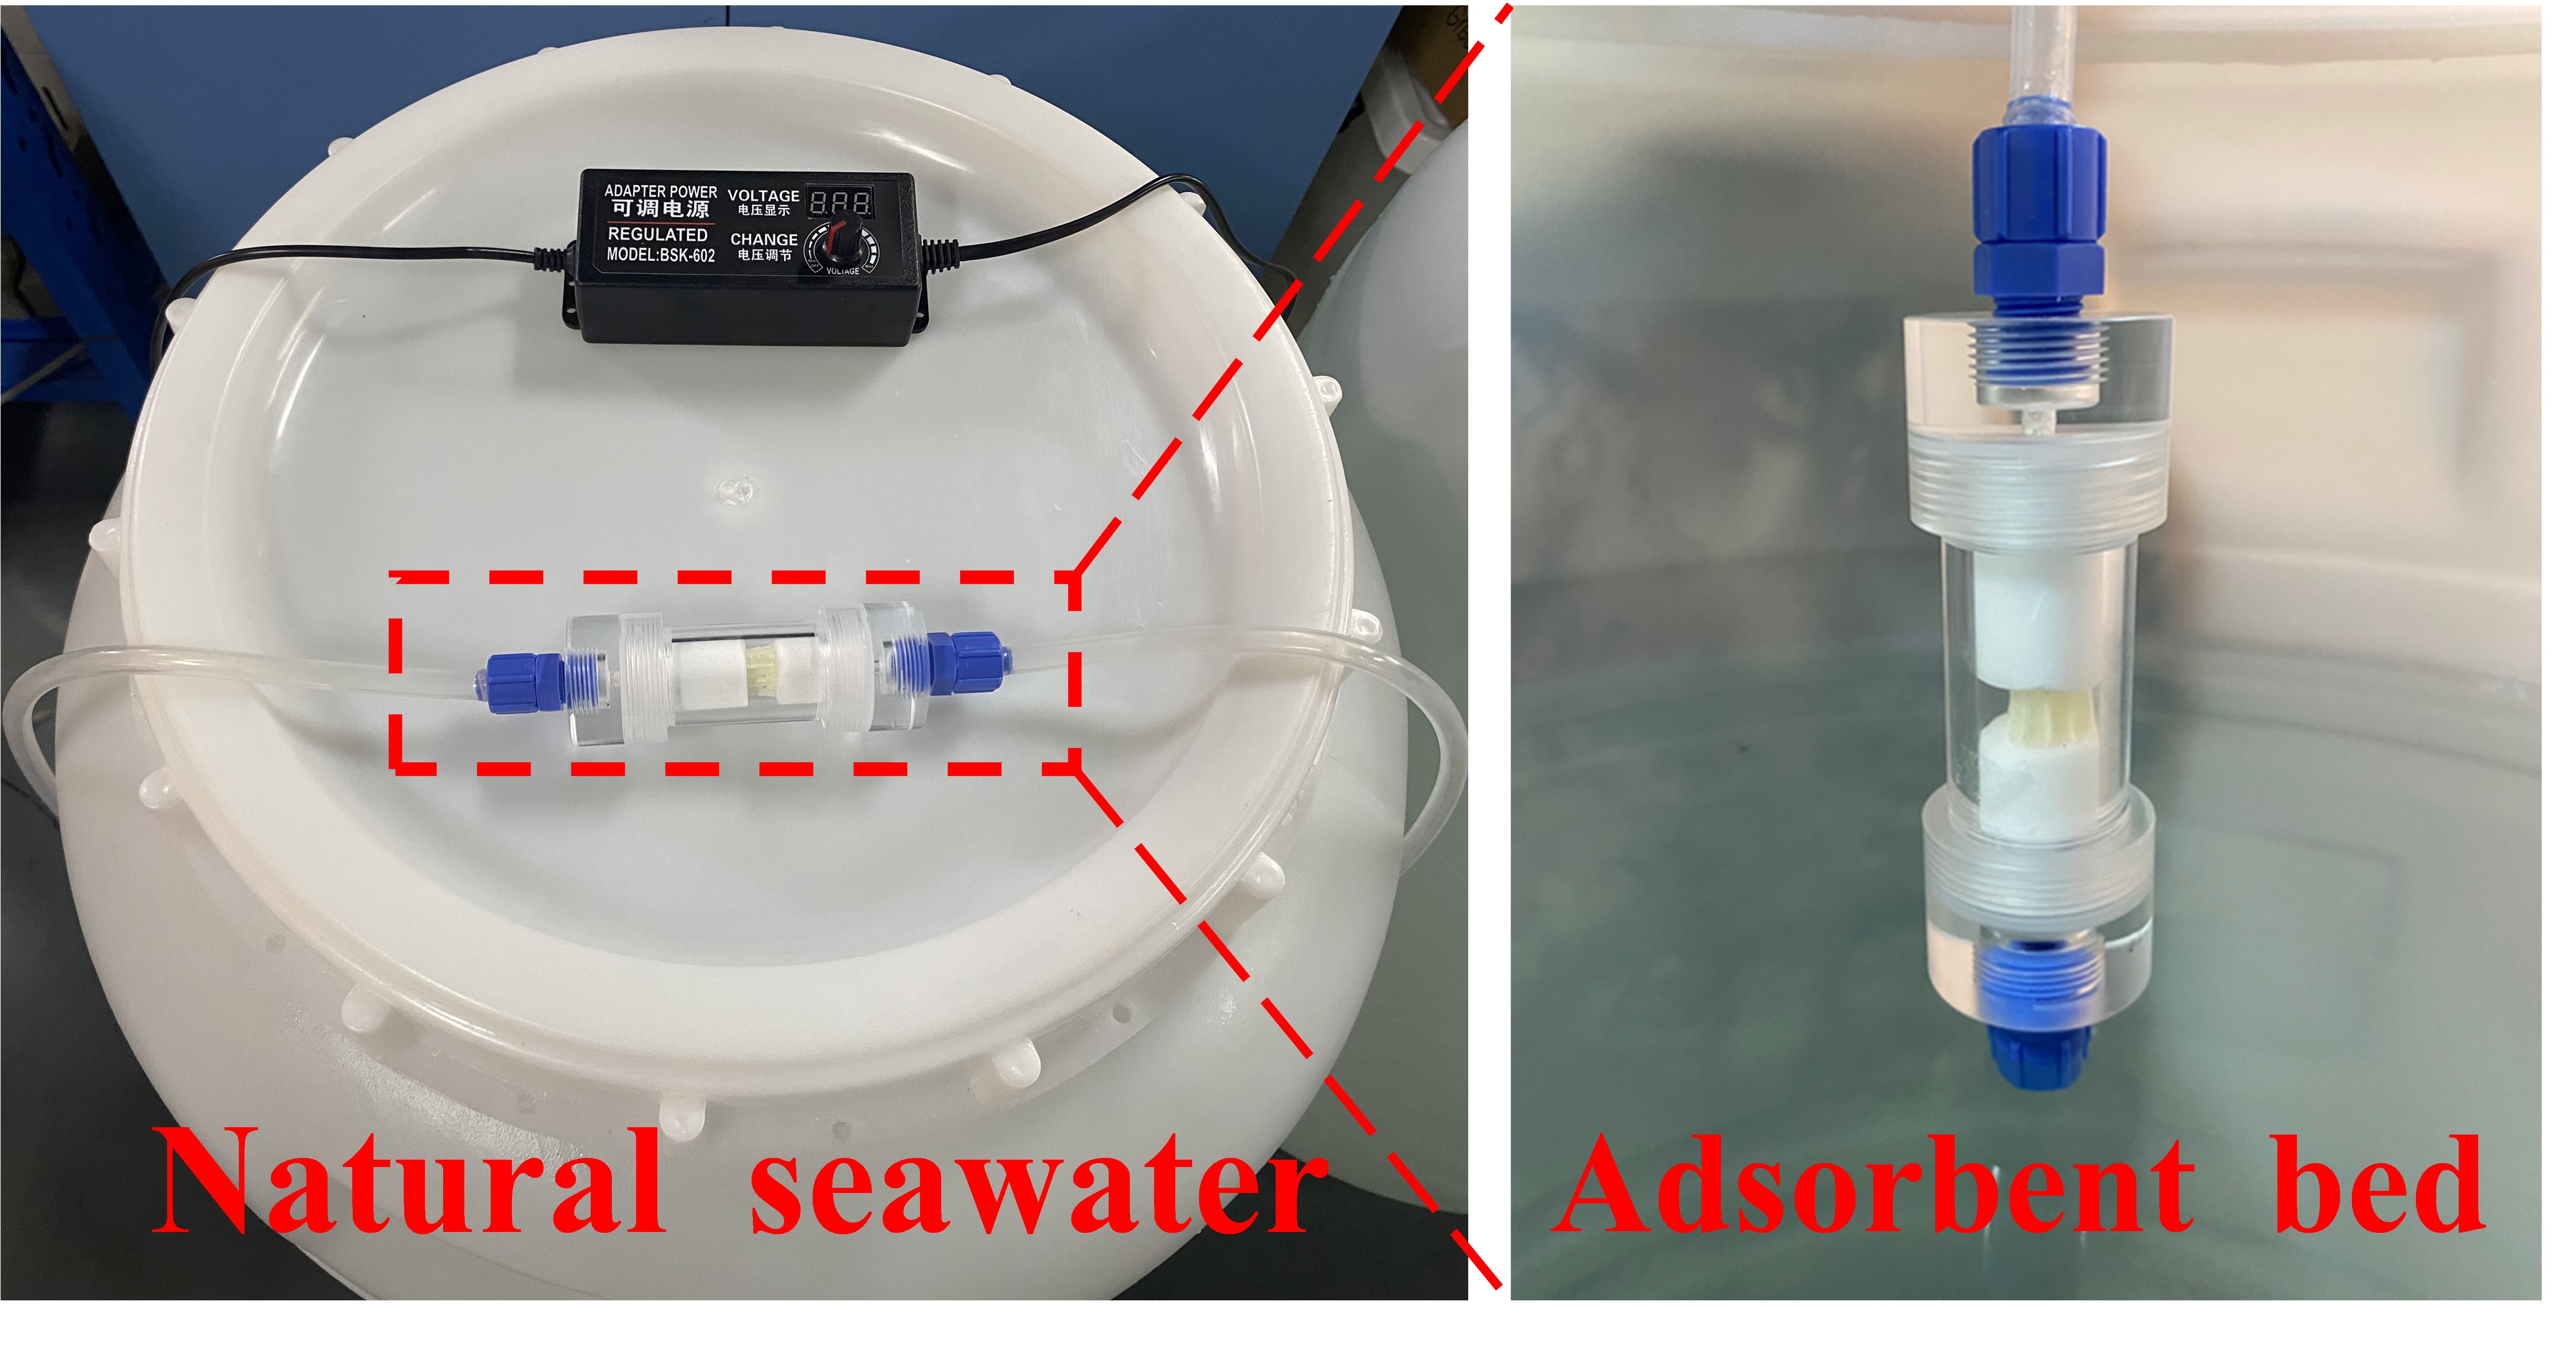
**

Supplementary Figure 23│An advanced marine water recirculation system was engineered for efficient uranium recovery applications.

2 Supplementary Tables

Supplementary Table 1 | Uranium adsorption capacities of IM-PAO, LP-PAO and HTC-PAO at different times.

|  | **IM-PAO** | | | **LP-PAO** | | | **HTC-PAO** | | |
| --- | --- | --- | --- | --- | --- | --- | --- | --- | --- |
|  | **4ppm** | **8ppm** | **16ppm** | **4ppm** | **8ppm** | **16ppm** | **4ppm** | **8ppm** | **16ppm** |
| 0 | 0.00 | 0.00 | 0.00 | 0.00 | 0.00 | 0.00 | 0.00 | 0.00 | 0.00 |
| 2 | 48.90 | 98.25 | 187.59 | 73.35 | 171.15 | 244.50 | 195.6 | 171.15 | 268.95 |
| 4 | 73.35 | 162.79 | 286.79 | 85.57 | 268.95 | 391.20 | 244.50 | 317.85 | 513.45 |
| 6 | 97.80 | 213.87 | 352.92 | 110.02 | 317.85 | 489.00 | 268.95 | 391.20 | 709.05 |
| 8 | 122.25 | 258.18 | 415.99 | 134.47 | 391.20 | 586.80 | 293.40 | 435.65 | 782.40 |
| 10 | 136.92 | 289.25 | 458.12 | 171.15 | 415.65 | 635.70 | 305.62 | 489.00 | 846.85 |
| 12 | 146.70 | 317.19 | 494.25 | 195.60 | 464.55 | 684.60 | 317.85 | 537.90 | 890.20 |
| 16 | 158.92 | 342.38 | 521.32 | 207.82 | 489.00 | 731.05 | 334.96 | 586.80 | 934.65 |
| 20 | 171.15 | 361.56 | 539.38 | 220.05 | 513.45 | 745.72 | 342.30 | 635.70 | 929.10 |
| 24 | 183.37 | 377.53 | 552.45 | 244.50 | 537.90 | 770.17 | 347.19 | 660.15 | 998.00 |
| 28 | 195.60 | 389.72 | 565.58 | 256.72 | 557.46 | 792.18 | 359.41 | 684.60 | 1002.44 |
| 32 | 207.82 | 400.69 | 576.73 | 268.95 | 574.57 | 806.85 | 366.75 | 733.50 | 1051.34 |
| 36 | 220.05 | 413.12 | 582.65 | 268.95 | 586.80 | 836.19 | 374.08 | 757.95 | 1063.57 |
| 40 | 220.05 | 422.66 | 588.26 | 281.17 | 603.91 | 843.52 | 378.97 | 782.40 | 1075.79 |
| 44 | 232.27 | 430.09 | 593.79 | 293.40 | 616.14 | 855.75 | 383.86 | 757.95 | 1100.24 |
| 48 | 232.27 | 435.73 | 598.71 | 293.40 | 616.14 | 855.75 | 391.20 | 782.40 | 1100.24 |

Supplementary Table 2 | Fitting parameters of adsorption kinetics data based on pseudo-second-order and pseudo-first-order models.

|  | ***C*0 (ppm)** | **Pseudo-second-order** | | **Pseudo-first-order** | |
| --- | --- | --- | --- | --- | --- |
|  |  | ***R2*** | ***q*e (mg g-1)** | ***R2*** | ***q*e (mg g-1)** |
| IM-PAO | 4 | 0.9942 | 228.63 | 0.9823 | 221.92 |
| 8 | 0.9998 | 433.97 | 0.9929 | 417.16 |
| 16 | 0.9970 | 604.46 | 0.9940 | 579.67 |
| LP-PAO | 4 | 0.9910 | 293.44 | 0.9862 | 284.77 |
| 8 | 0.9978 | 612.07 | 0.9850 | 588.20 |
| 16 | 0.9973 | 860.04 | 0.9918 | 824.08 |
| HTC-PAO | 4 | 0.9903 | 375.25 | 0.9471 | 360.01 |
| 8 | 0.9962 | 779.28 | 0.9838 | 752.21 |
| 16 | 0.9891 | 1099.80 | 0.9855 | 1050.55 |

Supplementary Table 3 | Fitting parameters of equilibrium adsorption isotherms of IM-PAO, LP-PAO and HTC-PAO based on Langmuir and Freundlich models.

|  | **Langmuir model** | | **Freundlich model** | |
| --- | --- | --- | --- | --- |
|  | ***R*2** | **(mg g-1)** | ***R*2** | **(mg g-1)** |
| IM-PAO | 0.92532 | 712.16 | 0.68055 | 775.37 |
| LP-PAO | 0.93544 | 1024.38 | 0.71298 | 1119.61 |
| HTC-PAO | 0.95798 | 1343.6 | 0.77258 | 1475.75 |

Supplementary Table 4 | IM–PAO adsorption model parameters.

| **Parameters** | **Value** | **Unit** |
| --- | --- | --- |
|  | 0.856 |  |
|  | 1.176E-6 |  |
|  | 1.739E-9 |  |
|  | 0.147 |  |

Supplementary Table 5 | LP–PAO adsorption model parameters.

| **Parameters** | **Value** | **Unit** |
| --- | --- | --- |
|  | 0.863 |  |
|  | 1.176E-6 |  |
|  | 1.739E-9 |  |
|  | 0.147 |  |

Supplementary Table 6 | HTC–PAO adsorption model parameters.

| **Parameters** | **Value** | **Unit** |
| --- | --- | --- |
|  | 0.878 |  |
|  | 1.176E-6 |  |
|  | X = 6.956E-9 |  |
| Y = 6.956E-9 |  |
| Z = 1.739E-9 |  |
|  | 0.147 |  |

Supplementary Table 7 | Fluid parameters and solid phase density.

| **Parameters** | **Value** | **Unit** |
| --- | --- | --- |
|  | 1025 |  |
|  | 0.796 |  |
|  | 0.001 |  |
|  | 8 |  |
|  | 1141.100 |  |

Supplementary Table 8 | The maximum errors and the average errors of the three adsorbents.

| **Adsorbents** | **Maximum error** | **average error** |
| --- | --- | --- |
| IM-PAO | 14.84% | 2.77% |
| LP-PAO | 16.97% | 4.81% |
| HTC-PAO | 10.92% | 6.13% |

Supplementary Table 9 | Uranium adsorption capacity of HTC-PAO adsorbent at different cycle numbers in simulated seawater.

| **Recycles** | **Adsorption capacity (mg g−1)** | **Elution Capacity**  **(mg g−1)** | **Elution efficiency (%)** |
| --- | --- | --- | --- |
| 1 | 772.20 | 758.33 | 98.20 |
| 2 | 738.26 | 710.96 | 96.30 |
| 3 | 701.79 | 668.70 | 95.29 |
| 4 | 689.00 | 642.45 | 93.24 |
| 5 | 671.55 | 613.08 | 91.30 |

Supplementary Table 10 | Concentration of uranium and competitive metal ions in natural seawater and metal-ion-spiked seawater.

| **Metal** | **Natural seawater**  **(ppb)** | **Metal ion-spiked seawater (ppb)** |
| --- | --- | --- |
| **U** | 3.3 | 330 |
| **V** | 1.5 | 150 |
| **Mn** | 0.2 | 20 |
| **Co** | 0.05 | 5 |
| **Ni** | 1.0 | 100 |
| **Cu** | 0.6 | 60 |
| **Pb** | 0.03 | 3 |
| **Cr** | 0.3 | 30 |
| **Zn** | 4.0 | 400 |

Supplementary Table 11 | Comparison of the uranium adsorption performance in nature seawater between the HTC-PAO and many other recoverable AO-based uranium adsorbents.

|  | **Absorbents** | **Year** | ***q*e (mg g−1)** | **Time (day)** |
| --- | --- | --- | --- | --- |
| **a** | **HTC-PAO** |  | **14.69** | **35** |
| b | PGP hydrogel1 | 2024 | 9.73 | 11 |
| c | PAO PEI sponge2 | 2024 | 9.79 | 15 |
| d | Y-PAO hydrogel3 | 2024 | 10.07 | 28 |
| e | PAO/PMPC-SH4 | 2024 | 6.26 | 28 |
| f | SF-g-PAO5 | 2024 | 4.95 | 28 |
| g | Cs-PIDO-16 | 2023 | 5.75 | 28 |
| h | PE-PAO@ADH7 | 2024 | 6.76 | 30 |
| i | PAO-CNF hydrogel8 | 2024 | 6.6 | 35 |
| j | h-PAO9 | 2023 | 9.86 | 49 |
| k | PAO-PNF10 | 2023 | 5 | 12 |
| l | PP@MeP-H11 | 2023 | 3.12 | 21 |
| m | PAO-BS12 | 2023 | 2.7 | 10 |
| n | ML-r-PAO@HB13 | 2023 | 9.74 | 28 |
| o | MP-PAO14 | 2022 | 5.8 | 28 |
| p | PAO@CHM15 | 2022 | 7.46 | 28 |
| q | HA-PAO NFMs16 | 2022 | 6.73 | 28 |
| r | PAO-BSPE17 | 2022 | 12.67 | 64 |
| s | PAO-PHMB-A18 | 2021 | 3.19 | 30 |
| t | PAO-CB19 | 2021 | 8.56 | 56 |
| u | PA-PAO/CS NFs20 | 2021 | 4.91 | 10 |
| v | NC-PAO DN hydrogel21 | 2021 | 8.62 | 25 |
| w | AOP@PPLA22 | 2020 | 10.31 | 35 |
| x | Zn2+-PAO23 | 2020 | 9.23 | 28 |
| y | PAO/Alg NFs24 | 2020 | 8.42 | 56 |
| z | Anti-PAO gels25 | 2020 | 9.29 | 30 |

3 Supplementary References

1. Liu T*, et al.* Engineering shrinkage resistance of nano-structured hydrogels in seawater for fast uranium capture. *Chem. Eng. J.* **496**, 153832 (2024).

2. Ou M, Li W, Huang Z, Xu X. Highly efficient extraction of uranium(VI) from seawater by polyamidoxime/polyethyleneimine sponge. *Sep. Purif. Technol.* **331**, 125721 (2024).

3. Wang H, Yao W, Yuan Y, Shi S, Liu T, Wang N. Yeast‐Raised Polyamidoxime Hydrogel Prepared by Ice Crystal Dispersion for Efficient Uranium Extraction from Seawater. *Adv. Sci.* **11**, 2306534 (2024).

4. Cao M*, et al.* Poly(amidoxime)/polyzwitterionic semi-interpenetrating network hydrogel with robust salt-shrinkage resistance for enhanced uranium extraction from seawater. *Chem. Eng. J.* **481**, 148536 (2024).

5. Huang C*, et al.* Constructing amidoxime adsorption sites on the core-shell structured natural silk protein for uranium capture. *Int. J. Biol. Macromol.* **267**, 131608 (2024).

6. Zhang Y, Cai T, Zhao Z, Han B. Chitosan-poly(imide dioxime) semi-interpenetrating network hydrogel for efficient uranium recovery from seawater. *J. Radioanal. Nucl. Chem.* **333**, 31-41 (2023).

7. Yao Y*, et al.* Hydrazide and amidoxime dual functional membranes for uranium extraction from seawater. *J. Mater. Chem. A.* **12**, 10528-10538 (2024).

8. Huang Y, Zou S, Li Z, Na B, Lin S, Zhang S. Tough polyamidoxime-nanocellulose supramolecular composite hydrogels for effective uranium extraction from seawater. *Polymer.* **298**, 126895 (2024).

9. Luo G*, et al.* Salt-shrinkage resistant poly(amidoxime) adsorbent for improved extraction of uranium from seawater. *Chem. Eng. J.* **464**, 142569 (2023).

10. Ye Q-H, Ye H, Hu Z-T, Wu M-B, Yao J. Polyamidoxime nanofiber membranes with hierarchical pores for enhanced uranium extraction from seawater. *Compos. Commun.* **43**, 101725 (2023).

11. Zhang J*, et al.* Methyl 4-hydroxybenzoate nanospheres anchored on poly(amidoxime)/polyvinyl alcohol hydrogel network with excellent antibacterial activity for efficient uranium extraction from seawater. *Desalination.* **548**, 116243 (2023).

12. Wang Y*, et al.* Polyamidoxime-loaded biochar sphere with high water permeability for fast and effective recovery of uranium from seawater. *J. Water Process Eng.* **55**, 104205 (2023).

13. Jiao G-J, Ma J, Zhang J, Zhai S, Sun R. Efficient extraction of uranium from seawater by reticular polyamidoxime-functionalized oriented holocellulose bundles. *Carbohyd. Polym.* **300**, 120244 (2023).

14. Wang H*, et al.* Macroporous hydrogel membrane by cooperative reaming for highly efficient uranium extraction from seawater. *Sep. Purif. Technol.* **289**, 120823 (2022).

15. Jiao G-J, Ma J, Zhang J, Li Y, Liu K, Sun R. Porous and biofouling-resistant amidoxime-based hybrid hydrogel with excellent interfacial compatibility for high-performance recovery of uranium from seawater. *Sep. Purif. Technol.* **287**, 120571 (2022).

16. Xu X*, et al.* Engineering biaxial stretching polyethylene membrane with poly(amidoxime)-nanoparticle and mesopores architecture for uranium extraction from seawater. *Chem. Eng. J.* **430**, 133159 (2022).

17. Shi S*, et al.* High-strength and anti-biofouling nanofiber membranes for enhanced uranium recovery from seawater and wastewater. *J. Hazard. Mater.* **436**, 128983 (2022).

18. He N*, et al.* Polyguanidine-modified adsorbent to enhance marine applicability for uranium recovery from seawater. *J. Hazard. Mater.* **416**, 126192 (2021).

19. Wang D*, et al.* Blow spinning of pre–acid-activated polyamidoxime nanofibers for efficient uranium adsorption from seawater. *Mater. Today. Energy.* **21**, 100735 (2021).

20. Liu R*, et al.* A nanoclay enhanced Amidoxime-Functionalized Double-Network hydrogel for fast and massive uranium recovery from seawater. *Chem. Eng. J.* **422**, 130060 (2021).

21. Lim YJ, Goh K, Goto A, Zhao Y, Wang R. Uranium and lithium extraction from seawater: challenges and opportunities for a sustainable energy future. *J. Mater. Chem. A.* **11**, 22551-22589 (2023).

22. Yan B, Ma C, Gao J, Yuan Y, Wang N. An Ion‐Crosslinked Supramolecular Hydrogel for Ultrahigh and Fast Uranium Recovery from Seawater. *Adv. Mater.* **32**, 1906615 (2020).

23. Xu X*, et al.* Aqueous Solution Blow Spinning of Seawater‐Stable Polyamidoxime Nanofibers from Water‐Soluble Precursor for Uranium Extraction from Seawater. *Small. Methods.* **4**, 2000558 (2020).

24. Shi S, Li B, Qian Y, Mei P, Wang N. A simple and universal strategy to construct robust and anti-biofouling amidoxime aerogels for enhanced uranium extraction from seawater. *Chem. Eng. J.* **397**, 125337 (2020).

25. Yuan Y*, et al.* Charge balanced anti-adhesive polyacrylamidoxime hydrogel membrane for enhancing uranium extraction from seawater. *Chem. Eng. J.* **421**, 127878 (2021).
